# Supplementary material for: Losing helena: The extinction of a drosophila line-like element
Source: PubMed Central journal article supplement (PMC2330053; doi:10.1186/1471-2164-9-149), 2008-03-31
Supplement: 1471-2164-9-149-S4.pdf [file 1471-2164-9-149-S4.pdf]

|                |            |            |            |            |            |            |
|----------------|------------|------------|------------|------------|------------|------------|
| chr3R_1506433  | AAGAAATGCG | GCAAGTAGCT | GGTAAGTCTC | CACTGGATAT | CAGGATGGAA | TTATTGAAT- |
| Brazzaville_16 | -----      | -----      | -----      | -----      | -----      | -----      |
| Eden_3         | -----      | -----      | -----      | -----      | -----      | -----      |
| Cann-River_9   | -----      | -----      | -----      | -----      | -----      | -----      |
| Amieu_2        | -----      | -----      | -----      | -----      | -----      | -----      |
| Makindu_2      | AAGAAATGCG | GCAAGTAGCT | GGTAAGTCTC | CACTGAATAT | CAGGATGGAG | TTATTGAAC- |
| Makindu_6      | AAGAAATGCG | GCAAGTAGCT | GGTAAGTCTC | CACTGAATAT | CAGGATGGAG | TTATTGAAC- |
| Makindu_7      | AAGAAATGCG | GCAAGTAGCT | GGTAAGTCTC | CACTGAATAT | CAGGATGGAG | TTATTGAAC- |
| Valence_6      | AAGAAATGCG | GCAAGTAGCT | GGTAAGTCTC | CACTGAATAT | CAGGATGGAG | TTATTGAAC- |
| Makindu_8      | AAGAAATGCG | GCAAGTAGCT | GGTAAGTCTC | CACTGAATAT | CAGGATGGAG | TTATTGAAC- |
| Makindu_22     | AAGAAATGCG | GCAAGTAGCT | GGTAAGTCTC | CACTGGATAT | CAGGATGGAA | TTATTGAAT- |
| Canberra_5     | AAGAAATGCG | GCAAGTAGCT | GGTAAGTCTC | CACTGAATAT | CAGGATGGAG | TTATTGAAC- |
| Cann-River_2   | AAGAAATGCG | GCAAGTAGCT | GGTAAGTCTC | CACTGAATAT | CAGGATGGAG | TTATTGAAC- |
| Cann-River_6   | AAGAAATGCG | GCAAGTAGCT | GGTAAGTCTC | CACTGAATAT | CAGGATGGAG | TTATTGAAC- |
| Cann-River_7   | AAGAAATGCG | GCAAGTAGCT | GGTAAGTCTC | CACTGAATAT | CAGGATGGAG | TTATTGAAC- |
| Cann-River_5   | AAGAAATGCG | GCAAGTAGCT | GGTAAGTCTC | CACTGAATAT | CAGGATGGAG | TTATTGAAC- |
| Cann-River_8   | AAGAAATGCG | GCAAGTAGCT | GGTAAGTCTC | CACTGGATAT | CAGGATGGAA | TTATTGAAT- |
| Valence_5      | AAGAAATGCG | GCAAGTAGCT | GGTAAGTCTC | CACTGAATAT | CAGGATGGAG | TTATTGAAC- |
| Valence_9      | AAGAAATGCG | GCAAGTAGCT | GGTAAGTCTC | CACTGAATAT | CAGGATGGAG | TTATTGAAC- |
| Eden_1         | AAGAAATGCG | GCAAGTAGCT | GGTAAGTCTC | CACTGAATAT | CAGGATGGAG | TTATTGAAC- |
| Valence_13     | AAGAAATGCG | GCAAGTAGCT | GGTAAGTCTC | CACTGAATAT | CAGGATGGAG | TTATTGAAC- |
| Eden_7         | AAGAAATGCG | GCAAGTAGCT | GGTAAGTCTC | CACTGAATAT | CAGGATGGAG | TTATTGAAC- |
| Valence_4      | AAGAAATGCG | GCAAGTAGCT | GGTAAGTCTC | CACTGAATAT | CAGGATGGAG | TTATTGAAC- |
| Valence_2      | AAGAAATGCG | GCAAGTAGCT | GGTAAGTCTC | CACTGAATAT | CAGGATGGAG | TTATTGAAC- |
| Valence_1      | AAGAAATGCG | GCAAGTAGCT | GGTAAGTCTC | CACTGAATAT | CAGGATGGAG | TTATTGAAC- |
| Valence_7      | AAGAAATGCG | GCAAGTAGCT | GGTAAGTCTC | CACTGAATAT | CAGGATGGAG | TTATTGAAC- |
| Makindu_cm1    | AAGAAATGCG | GCAAGTAGCT | GGTAAGTCTC | CACTGAATAT | CAGGATGGAG | TTATTGAAC- |
| Makindu_cm6    | AAGAAATGCG | GCAAGTAGCT | GGTAAGTCTC | CACTGAATAT | CAGGATGGAG | TTATTGAAC- |
| Makindu_1      | AAGAAATGCG | GCAAGTAGCT | GGTAAGTCTC | CACTGAATAT | CAGGATGGAG | TTATTGAAC- |
| Amieu_5        | AAGAAATGCG | GCAAGTAGCT | GGTAAGTCTC | CACTGGATAT | CAGGATGGAA | TTATTGAAT- |
| Eden_11        | AAGAAATGCG | GCAAGTAGCT | GGTAAGTCTC | CACAGGATAT | CAGGATGGAG | TAATGGAAT  |
| Cann-River_10  | -----      | -----      | -----      | -----      | -----      | -----      |
| Brazzaville_10 | -----      | -----      | -----      | -----      | -----      | -----      |
| Cann-River_3   | AAGAAATGCG | GCAAGTAGCT | GGTAAGTCCC | CACTGGATAT | CAGGATGGAA | TTATTGAAT- |
| Cann-River_13  | AAGAAATGCG | GCAAGTAGCT | GGTAAGTCTC | CACAGGATAT | CAGGATGGAG | TAATGGAAT- |
| Eden_4         | AAGAAATGCG | GCAAGTAGCT | GGTAAGTCTC | CACAGGATAT | CAGGATGGAG | TAATGGAAT- |
| Makindu_10     | AAGAAATGCG | GCAAGTAGCT | GGTAAGTCTC | CACAGGATAT | CAGGATGGAG | TAATGGAAT- |
| Makindu_11     | AAGAAATGCG | GCAAGTAGCT | GGTAAGTCTC | CACAGGATAT | CAGGATGGAG | TAATGGAAT- |
| Brazzaville_11 | AAGAAATGCG | GCAAGTAGCT | GGTAAGTCTC | CACTGAATAT | CAGGATGGAG | TTATTGAAC- |
| Brazzaville_12 | AAGAAATGCG | GCAAGTAGCT | GGTAAGTCTC | CACTGAATAT | CAGGATGGAG | TTATTGAAC- |
| Brazzaville_8  | AAGAAATGCG | GCAAGTAGCT | GGTAAGTCTC | CACTGAATAT | CAGGATGGAG | TTATTGAAC- |
| chrU_963982    | AAGAAATGCG | GCAAGTAGCT | GGTAAGTCTC | CACTGGATAT | CAGGATGGAG | TTATTGAAT- |
| chr3L_18642496 | AAGAAATGCG | GCAAGTAGCT | GGTAAGTCTC | CACTGGATAT | CAGGATGGAA | TTATTGAAT- |
| chrU_3975907   | AAGAAATGCG | GCAAGTAGCT | GGTAAGTCTC | CGCTGGATAT | CAGGATGGAG | TTATTGAAT- |
| chrU_10625041  | -----      | -----      | -----      | -----      | -----      | -----      |
| chrU_2316095   | -----      | -----      | -----      | -----      | -----      | -----      |
| chrU_4537377   | -----      | -----      | -----      | -----      | -----      | -----      |
| chrU_5384045   | -----      | -----      | -----      | -----      | -----      | -----      |
| chrU_5680622   | AAGAAATGCG | GCAAGTAGCT | GGTAAGTCTC | CACTGGATAT | CAGGATGGAG | TTATTGAAT- |
| chrU_5950518   | -----      | -----      | -----      | -----      | -----      | -----      |
| chrU_6132643   | AAGAAATGCG | GCAAGTAGCT | GGTAAGTCTC | CACTGGATAT | CAGGATGGAA | TTATTGAAT- |
| chrX_16602314  | -----      | -----      | -----      | -----      | -----      | -----      |
| chrU_6536133   | -----      | -----      | -GTAATCTC  | CACTGGAGAT | CAGGATGGAG | TTATTGAATA |

|                |            |            |            |            |            |               |
|----------------|------------|------------|------------|------------|------------|---------------|
| chr3R_1506433  | --CAACGCTC | TTCATGCACT | GAATCTGTTA | ACCTAAGCAC | AATAACTACG | ACGATAACAT    |
| Brazzaville_16 | ----       | ----       | ----       | ----       | ----       | ----          |
| Eden_3         | ----       | ----       | ----       | ----       | ----       | ----          |
| Cann-River_9   | ----       | ----       | ----       | ----       | ----       | ----          |
| Amieu_2        | ----       | ----       | ----       | ----       | ----       | ----          |
| Makindu_2      | --CAACGCTT | TTCATGCACT | GAATCTGTTA | ACCTAAGCAC | AATAACTACG | ACGATAACAT    |
| Makindu_6      | --CAACGCTT | TTCATGCACT | GAATCTGTTA | ACCTAAGCAC | AATAACTACG | ACGATAACAT    |
| Makindu_7      | --CAACGCTT | TTCATGCACT | GAATCTGTTA | ACCTAAGCAC | AATAACTACG | ACGATAACAT    |
| Valence_6      | --CAACGCTT | TTCATGCACT | GAATCTGTTA | ACCTAAGCAC | AATAACTACG | ACGATAACAT    |
| Makindu_8      | --CAACGCTT | TTCATGCACT | GAATCTGTTA | ACCTAAGCAC | AATAACTACG | ACGATAACAT    |
| Makindu_22     | --CAACGCTC | TTCATGCACT | GAATCTGTTA | ACCTAAGCAC | AATAACTACG | ACGATAACAT    |
| Canberra_5     | --CAACGCTT | TTCATGCACT | GAATCTGTTA | ACCTAAGCAC | AATAACTACG | ACGATAACAT    |
| Cann-River_2   | --CAACGCTT | TTCATGCACT | GAATCTGTTA | ACCTAAGCAC | AATAACTACG | ACGATAACAT    |
| Cann-River_6   | --CAACGCTT | TTCATGCACT | GAATCTGTTA | ACCTAAGCAC | AATAACTACG | ACGATAACAT    |
| Cann-River_7   | --CAACGCTT | TTCATGCACT | GAATCTGTTA | ACCTAAGCAC | AATAACTACG | ACGATAACAT    |
| Cann-River_5   | --CAACGCTT | TTCATGCACT | GAATCTGTTA | ACCTAAGCAC | AATAACTACG | ACGATAACAT    |
| Cann-River_8   | --CAACGCTC | TTCATGCACT | GAATCTGTTA | ACCTAAGCAC | AATAACTACG | ACGATAACAT    |
| Valence_5      | --CAACGCTT | TTCATGCACT | GAATCTGTTA | ACCTAAGCAC | AATAACTACG | ACGATAACAT    |
| Valence_9      | --CAACGCTT | TTCATGCACT | GAATCTGTTA | ACCTAAGCAC | AATAACTACG | ACGATAACAT    |
| Eden_1         | --CAACGCTT | TTCATGCACT | GAATCTGTTA | ACCTAAGCGC | AATAACTGCG | ACGATAACAT    |
| Valence_13     | --CAACGCTT | TTCATGCACT | GAATCTGTTA | ACCTAAGCAC | AATAACTACG | ACGATAACAT    |
| Eden_7         | --CAACGCTT | TTCATGCACT | GAATCTGTTA | ACCTAAGCGC | AATAACTGCG | ACGATAACAT    |
| Valence_4      | --CAACGCTT | TTCATGCACT | GAATCTGTTA | ACCTAAGCAC | AATAACTACG | ACGATAACAT    |
| Valence_2      | --CAACGCTT | TTCATGCACT | GAATCTGTTA | ACCTAAGCAC | AATAACTACG | ACGATAACAT    |
| Valence_1      | --CAACGCTT | TTCATGCACT | GAATCTGTTA | ACCTAAGCAC | AATAACTACG | ACGATAACAT    |
| Valence_7      | --CAACGCTT | TTCATGCACT | GAATCTGTTA | ACCTAAGCAC | AATAACTACG | ACGATAACAT    |
| Makindu_cm1    | --CAACGCTT | TTCATGCACT | GAATCTGTTA | ACCTAAGCAC | AATAACTACG | ACGATAACAT    |
| Makindu_cm6    | --CAACGCTT | TTCATGCACT | GAATCTGTTA | ACCTAAGCAC | AATAACTACG | ACGATAACAT    |
| Makindu_1      | --CAACGCTT | TTCATGCACT | GAATCTGTTA | ACCTAAGCAC | AATAACTACG | ACGATAACAT    |
| Amieu_5        | --CAACGCTC | TTCATGCACT | GAATCTGTTA | AC--AAGCAC | AATAACTACG | ACGATAACAT    |
| Eden_11        | --CAACGCTT | TTCATGCACT | GAATCTGTTA | ACCTAAGCAC | AATA-CTAC- | ----          |
| Cann-River_10  | ----       | ----       | ----       | ----       | ----       | CG ACGATAACAT |
| Brazzaville_10 | ----       | ----       | ----       | ----       | ----       | CG ACGATAACAT |
| Cann-River_3   | --CAACGCTC | TTCATGCACT | GAATCTGTTA | ACCTAAGCAC | AATAACTACG | ACGATAACAT    |
| Cann-River_13  | --CAACGCTT | TTCATGCACT | GAATCTGTTA | ACCTAAGCAC | AATA-CTAC- | ----          |
| Eden_4         | --CAACGCTT | TTCATGCACT | GAATCTGTTA | ACCTAAGCAC | AATA-CTAC- | ----          |
| Makindu_10     | --CAACGCTT | TTCATGCACT | GAATCTGTTA | ACCTAAGCAC | AATA-CTAC- | ----          |
| Makindu_11     | --CAACGCTT | TTCATGCACT | GAATCTGTTA | ACCTAAGCAC | AATA-CTAC- | ----          |
| Brazzaville_11 | --CAACGCTT | TTCATGCACT | GAATCTGTTA | ACCTAAGCAC | AATAACTACG | ACGATAACAT    |
| Brazzaville_12 | --CAACGCTT | TTCATGCACT | GAATCTGTTA | ACCTAAGCAC | AATAACTACG | ACGATAACAT    |
| Brazzaville_8  | --CAACGCTT | TTCATGCACT | GAACCTGTTA | ACCTAAGCAC | AATAACTACg | ACGATAACAT    |
| chrU_963982    | --CAACGCTT | TTCATGCACT | GAATCTGTTA | ACCTAAGCAC | AATATCTACG | ACGATAACAT    |
| chr3L_18642496 | --CAACGCTC | TTCATGCACT | GAATCTGTTA | ACCTAAGCAC | AATAACTACG | ACGATAACAT    |
| chrU_3975907   | --CAACGCTT | TTCATGCACT | GAATCTGTTA | ACCTAAGCAC | AATAACTACG | ACGATAACAT    |
| chrU_10625041  | ----       | ----       | ----       | ----       | ----       | ----          |
| chrU_2316095   | ----       | ----       | ----       | ----       | ----       | ----          |
| chrU_4537377   | ----       | ----       | ----       | ----       | ----       | ----          |
| chrU_5384045   | ----       | ----       | ----       | ----       | ----       | ----          |
| chrU_5680622   | --CAACGCTT | TTCATGCACT | GAATCTGTTA | ACCTAAGCAC | AATAACTACG | ACGATAACAT    |
| chrU_5950518   | ----       | ----       | ----       | ----       | ----       | ----          |
| chrU_6132643   | --CAACGCTC | TTCATGCACT | GAATCTGTTA | ACCTAAGCAC | AATAACTACG | ACGATAACAT    |
| chrX_16602314  | ----       | ----       | ----       | ----       | ----       | ----          |
| chrU_6536133   | ATCAACGCTT | TTCATGCACT | GAATCTGGTA | ACCTAAGCAC | AATAACTACG | ACGGCAACAT    |

|                |            |            |               |             |            |            |
|----------------|------------|------------|---------------|-------------|------------|------------|
| chr3R_1506433  | TTACAAGTGC | AACTTGCAAT | ACTACATCTA    | CAACAAC TGC | AGCAATCAGT | AGGCCGAGCT |
| Brazzaville_16 | -----      | -----      | -----         | -----       | -----      | -----      |
| Eden_3         | -----      | -----      | -----         | -----       | -----      | -----      |
| Cann-River_9   | -----      | -----      | -----         | -----       | -----      | -----      |
| Amieu_2        | -----      | -----      | -----         | -----       | -----      | -----      |
| Makindu_2      | TTACAAGTGC | TACTTGCAAT | ACTACATCTA    | CAACAAC TGC | AGCAATCAGT | AGGCCGAGCT |
| Makindu_6      | TTACAAGTGC | TACTTGCAAT | ACTACATCTA    | CAACAAC TGC | AGCAATCAGT | AGGCCGAGCT |
| Makindu_7      | TTACAAGTGC | TACTTGCAAT | ACTACATCTA    | CAACAAC TGC | AGCAATCAGT | AGGCCGAGCT |
| Valence_6      | TTACAAGTGC | TACTTGCAAT | ACTACATCTA    | CAACAAC TGC | AGCAATCAGT | AGGCCGAGCT |
| Makindu_8      | TTACAAGTGC | TACTTGCAAT | ACTACATCTA    | CAACAAC TGC | AGCAATCAGT | AGGCCGAGCT |
| Makindu_22     | TTACAAGTGC | AACTTGCAAT | ACTACATCTA    | CAACAAC TGC | AGCAATCAGT | AGGCCGAGCT |
| Canberra_5     | TTACAAGTGC | TACTTGCAAT | ACTACATCTA    | CAACAAC TGC | AGCAATCAGT | AGGCCGAGCT |
| Cann-River_2   | TTACAAGTGC | TACTTGCAAT | ACTACATCTA    | CAACAAC TGC | AGCAATCAGT | AGGCCGAGCT |
| Cann-River_6   | TTACAAGTGC | TACTTGCAAT | ACTACATCTA    | CAACAAC TGC | AGCAATCAGT | AGGCCGAGCT |
| Cann-River_7   | TTACAAGTGC | TACTTGCAAT | ACTACATCTA    | CAACAAC TGC | AGCAATCAGT | AGGCCGAGCT |
| Cann_River_5   | TTACAAGTGC | TACTTGCAAT | ACTACATCTA    | CAACAAC TGC | AGCAATCAGT | AGGCCGAGCT |
| Cann-River_8   | TTACAAGTGC | AACTTGCAAT | ACTACATCTA    | CAACAAC TGC | AGCAATCAGT | AGGCCGAGCT |
| Valence_5      | TTACAAGTGC | TACTTGCAAT | ACTACATCTA    | CAACAAC TGC | AGCAATCAGT | AGGCCGAGCT |
| Valence_9      | TTACAAGTGC | TACTTGCAAT | ACTACATCTA    | CAACAAC TGC | AGCAATCAGT | AGGCCGAGCT |
| Eden_1         | TTACAAGTGC | TACTTGCAAT | ACTACATCTA    | CAACAAC TGC | AGCAATCAGT | AGGCCGAGCT |
| Valence_13     | TTACAAGTGC | TACTTGCAAT | ACTACATCTA    | CAACAAC TGC | AGCAATCAGT | AGGCCGAGCT |
| Eden_7         | TTACAAGTGC | TACTTGCAAT | ACTACATCTA    | CAACAAC TGC | AGCAATCAGT | AGGCCGAGCT |
| Valence_4      | TTACAAGTGC | TACTTGCAAT | ACTACATCTA    | CAACAAC TGC | AGCAATCAGT | AGGCCGAGCT |
| Valence_2      | TTACAAGTGC | TACTTGCAAT | ACTACATCTA    | CAACAAC TGC | AGCAATCAGT | AGGCCGAGCT |
| Valence_1      | TTACAAGTGC | TACTTGCAAT | ACTACATCTA    | CAACAAC TGC | AGCAATCAGT | AGGCCGAGCT |
| Valence_7      | TTACAAGTGC | TACTTGCAAT | ACTACATCTA    | CAACAAC TGC | AGCAATCAGT | AGGCCGAGCT |
| Makindu_cM1    | TTACAAGTGC | TACTTGCAAT | ACTACATCTA    | CAACAAC TGC | AGCAATCAGT | AGGCCGAGCT |
| Makindu_cM6    | TTACAAGTGC | TACTTGCAAT | ACTACATCTA    | CAACAAC TGC | AGCAATCAGT | AGGCCGAGCT |
| Makindu_1      | TTACAAGTGC | TACTTGCAAT | ACTACATCTA    | CAACAAC TGC | AGCAATCAGT | AGGCCGAGCT |
| Amieu_5        | TTACAAGTGC | AACTTGCAAT | ACTACATCTA    | CAACAAC TGC | AGCAATCAGT | AGGCCGAGCT |
| Eden_11        | -----      | -----      | AT ACTACATCTA | CAACAAC TAC | AGCAATCAGT | AGGCCGAGCT |
| Cann-River_10  | TTACAAGTGC | TACTTGCAAT | ACTACATCTA    | CTACAAC TGC | AGCAATCAGT | AGGCCGAGCT |
| Brazzaville_10 | TTACAAGTGC | TACTTGCAAT | ACTACATCTA    | CTACAAC TGC | AGCAATCAGT | AGGCCGAGCT |
| Cann-River_3   | TTACAAGTGC | AACTTGCAAT | ACTACATCTA    | CAACAAC TGC | AGCAATCAGT | AGGCCGAGCT |
| Cann-River_13  | -----      | -----      | AT ACTACATCTA | CAACAAC TAC | AGCAATCAGT | AGGCCGAGCT |
| Eden_4         | -----      | -----      | AT ACTACATCTA | CAACAAC TAC | AGCAATCAGT | AGGCCGAGCT |
| Makindu_10     | -----      | -----      | AT ACTACATCTA | CAACAAC TAC | AGCAATCAGT | AGGCCGAGCT |
| Makindu_11     | -----      | -----      | AT ACTACATCTA | CAACAAC TAC | AGCAATCAGT | AGGCCGAGCT |
| Brazzaville_11 | TTACAAGTGC | TACTTGCAAT | ACTACATCTA    | CAACAAC TGC | AGCAATCAGT | AGGCCGAGCT |
| Brazzaville_12 | TTACAAGTGC | TACTTGCAAT | ACTACATCTA    | CAACAAC TGC | AGCAATCAGT | AGGCCGAGCT |
| Brazzaville_8  | TTACAAGTGC | TACTTGCAAT | ACTACATCTA    | CAACAAC TGC | AGCAATCAGT | AGGCCGAGCT |
| chrU_963982    | TTACAAGTGC | TACTTGCAAT | ACTACATCTA    | CAACACCTGC  | AGCAATCAGT | AGGCCGAGCT |
| chr3L_18642496 | TTACAAGTGC | AACTTGCAAT | ACTACATCTA    | CAACAAC TGC | AGCAATCAGT | AGGCCGAGCT |
| chrU_3975907   | TTACAAGTGC | TACTTGCAA  | ACTACATCTA    | CTACAAC TGC | AGCAATCAGT | AGGCCGAGCT |
| chrU_10625041  | -----      | -----      | -----         | -----       | -----      | -----      |
| chrU_2316095   | -----      | -----      | -----         | -----       | -----      | -----      |
| chrU_4537377   | -----      | -----      | -----         | -----       | -----      | -----      |
| chrU_5384045   | -----      | -----      | -----         | -----       | -----      | -----      |
| chrU_5680622   | TTACAAGTGC | TACTTGCAAT | ACTACATCTA    | CAACAAC TGC | AGCAATCAGT | AGGCCGAGCT |
| chrU_5950518   | -----      | -----      | -----         | -----       | -----      | -----      |
| chrU_6132643   | TTACAAGTGC | AACTTGCAAT | ACTACATCTA    | CAACAAC TGC | AGCAATCAGT | AGGCCGAGCT |
| chrX_16602314  | -----      | -----      | -----         | -----       | -----      | -----      |
| chrU_6536133   | TTACATGTGT | TACTTGCAAT | ACTACATCTA    | CTACA       | -----      | -----      |

|                |            |            |                 |                 |                 |                 |
|----------------|------------|------------|-----------------|-----------------|-----------------|-----------------|
| chr3R_1506433  | CCAGAGAAAA | AGCTGCTACT | AGATTGTCCTG     | ATGCGCAAAA      | ACTTCTGACG      | AAAGAGAGGA      |
| Brazzaville_16 | -----      | -----      | -----           | -----           | -----           | -----           |
| Eden_3         | -----      | -----      | -----           | -----           | -----           | -----           |
| Cann-River_9   | -----      | -----      | -----           | -----           | -----           | -----           |
| Amieu_2        | -----      | -----      | -----           | -----           | -CTTCTGACG      | AAAGAGAGGA      |
| Makindu_2      | CCAGAGAAAA | AGCTGCTACT | AGATTGTCCTG     | ATGCGCAAAA      | ACTTCTGACG      | AAAGAGAGGA      |
| Makindu_6      | CCAGAGAAAA | AGCTGCTACT | AGATTGTCCTG     | ATGCGCAAAA      | ACTTCTGACG      | AAAGAGAGGA      |
| Makindu_7      | CCAGAGAAAA | AGCTGCTACT | AGATTGTCCTG     | ATGCGCAAAA      | ACTTCTGACG      | AAAGAGAGGA      |
| Valence_6      | CCAGAGAAAA | AGCTGCTACT | AGATTGTCCTG     | ATGCGCAAAA      | ACTTCTGACG      | AAAGAGAGGA      |
| Makindu_8      | CCAGAGAAAA | AGCTGCTACT | AGATTGTCCTG     | ATGCGCAAAA      | ACTTCTGACG      | AAAGAGAGGA      |
| Makindu_22     | CCAGAGAAAA | AGCTGCTACT | AGATTGTCCTG     | ATGCGCAAAA      | ACTTCTGACG      | AAAGAGAGGA      |
| Canberra_5     | CCAGAGAAAA | AGCTGCTACT | AGATTGTCCTG     | ATGCGCAAAA      | ACTTCTGACG      | AAAGAGAGGA      |
| Cann-River_2   | CCAGAGAAAA | AGCTGCTACT | AGATTGTCCTG     | ATGCGCAAAA      | ACTTCTGACG      | AAAGAGAGGA      |
| Cann-River_6   | CCAGAGAAAA | AGCTGCTACT | AGATTGTCCTG     | ATGCGCAAAA      | ACTTCTGACG      | AAAGAGAGGA      |
| Cann-River_7   | CCAGAGAAAA | AGCTGCTACT | AGATTGTCCTG     | ATGCGCAAAA      | ACTTCTGACG      | AAAGAGAGGA      |
| Cann_River_5   | CCAGAGAAAA | AGCTGCTACT | AGATTGTCCTG     | ATGCGCAAAA      | ACTTCTGACG      | AAAGAGAGGA      |
| Cann-River_8   | CCAGAGAAAA | AGCTGCTACT | AGATTGTCCTG     | ATGCGCAAAA      | ACTTCTGACG      | AAAGAGAGGA      |
| Valence_5      | CCAGAGAAAA | AGCTGCTACT | AGATTGTCCTG     | ATGCGCAAAA      | ACTTCTGACG      | AAAGAGAGGA      |
| Valence_9      | CCAGAGAAAA | AGCTGCTACT | AGATTGTCCTG     | ATGCGCAAAA      | ACTTCTGACG      | AAAGAGAGGA      |
| Eden_1         | CCAGAGAAAA | AGCTGCTACT | AGATTGTCCTG     | ATGCGCAAAA      | ACTTCTGACG      | AAAGAGAGGA      |
| Valence_13     | CCAGAGAAAA | AGCTGCTACT | AGATTGTCCTG     | ATGCGCAAAA      | ACTTCTGACG      | AAAGAGAGGA      |
| Eden_7         | CCAGAGAAAA | AGCTGCTACT | AGATTGTCCTG     | ATGCGCAAAA      | ACTTCTGACG      | AAAGAGAGGA      |
| Valence_4      | CCAGAGAAAA | AGCTGCTACT | AGATTGTCCTG     | ATGCGCAAAA      | ACTTCTGACG      | AAAGAGAGGA      |
| Valence_2      | CCAGAGAAAA | AGCTGCTACT | AGATTGTCCTG     | ATGCGCAAAA      | ACTTCTGACG      | AAAGAGAGGA      |
| Valence_1      | CCAGAGAAAA | AGCTGCTACT | AGATTGTCCTG     | ATGCGCAAAA      | ACTTCTGACG      | AAAGAGAGGA      |
| Valence_7      | CCAGAGAAAA | AGCTGCTACT | AGATTGTCCTG     | ATGCGCAAAA      | ACTTCTGACG      | AAAGAGAGGA      |
| Makindu_cm1    | CCAGAGAAAA | AGCTGCTACT | AGATTGTCCTG     | ATGCGCAAAA      | ACTTCTGACG      | AAAGAGAGGA      |
| Makindu_cm6    | CCAGAGAAAA | AGCTGCTACT | AGATTGTCCTG     | ATGCGCAAAA      | ACTTCTGACG      | AAAGAGAGGA      |
| Makindu_1      | CCAGAGAAAA | AGCTGCTACT | AGATTGTCCTG     | ATGCGCAAAA      | ACTTCTGACG      | AAAGAGAGGA      |
| Amieu_5        | CCAGAGAAAA | AGCTGCTACT | AGATTGTCCTG     | ATGCGCAAAA      | ACTTCTGACG      | AAAGAGAGGA      |
| Eden_11        | CCAGAGAAAA | AGCTGCTACT | AGATTGTCCTG     | ATGCGCAAAA      | ACTTCTGACG      | AAAGAGAGGA      |
| Cann-River_10  | CCAGAGAAAA | AGCAGCTACT | AGATAGTCTG      | ATGCGCAAAA      | ACTTCTGACG      | AAAGAGAGGA      |
| Brazzaville_10 | CCAGAGAAAA | AGCAGCTACT | AGATAGTCTG      | ATGCGCAAAA      | ACTTCTGACG      | AAAGAGAGGA      |
| Cann-River_3   | CCAGAGAAAA | AGCTGCTACT | AGATTGTCCTG     | ATGCGCAAAA      | ACTTCTGACG      | AAAGAGAGGA      |
| Cann-River_13  | CCAGAGAAAA | AGCTGCTACT | AGATTGTCCTG     | ATGCGCAAAA      | ACTTCTGACG      | AAAGAGAGGA      |
| Eden_4         | CCAGAGAAAA | AGCTTCTACT | AGATTGTCCTG     | ATGCGCAAAA      | ACTTCTGACG      | AAAGAGAGGG      |
| Makindu_10     | CCAGAGAAAA | AGCTTCTACT | AGATTGTCCTG     | ATGCGCAAAA      | ACTTCTGACG      | AAAGAGAGGA      |
| Makindu_11     | CCAGAGAAAA | AGCTTCTACT | AGATTGTCCTG     | ATGCGCAAAA      | ACTTCTGACG      | AAAGAGAGGA      |
| Brazzaville_11 | CCAGAGAAAA | AGCTGCTACT | AGATTGTCCTG     | ATGCGCAAAG      | ACTTCTGACG      | AAAGAGAGGA      |
| Brazzaville_12 | CCAGAGAAAA | AGCTGCTACT | AGATTGTCCTG     | ATGCGCAAAA      | ACTTCTGACG      | AAAGAGAGGA      |
| Brazzaville_8  | CCAGAGAAAA | AGCCGCTACT | AGATTGTCCTG     | ATGCGCAAAA      | ACTTCTGACG      | AAAGAGAGGA      |
| chrU_963982    | CCAGAGAAAA | AGCTGCTACT | AGATTGTCCTA     | ATGCGCAAAA      | ACTTCTGACG      | AAAGAGAGGA      |
| chr3L_18642496 | CCAGAGAAAA | AGCTGCTACT | AGATTGTCCTG     | ATGCGCAAAA      | ACTTCTGACG      | AAAGAGAGGA      |
| chrU_3975907   | CCAGAGAAAA | AGCTGCTACT | AGATAGTCTG      | ATGCGCAAAA      | ACTTCTGACG      | AAAGAGAGGA      |
| chrU_10625041  | -----      | -----      | -----           | -----           | -----           | -----           |
| chrU_2316095   | -----      | -----      | -----           | -----           | -----           | -----           |
| chrU_4537377   | -----      | -----      | -----           | -----           | -----           | -----           |
| chrU_5384045   | -----      | -----      | -----           | -----           | -----           | -----           |
| chrU_5680622   | CTAGAGAAAA | AGCTGCTACT | AGATTGTCCTG     | ATGCGCAAAA      | ACTTCTGACG      | AAAGAGAGGA      |
| chrU_5950518   | -----      | -----      | -----           | -----           | -----           | -----           |
| chrU_6132643   | CCAGAGAAAA | AGCTGCTACT | AGATTGTCCTG     | ATGCGCAAAA      | ACTTCTGACG      | AAAGAGAGGA      |
| chrX_16602314  | -----      | -----      | -----           | -----           | -----           | -----           |
| chrU_6536133   | -----      | -----GCAAT | -----CAGTAGTCTG | -----ATGCGCAAAA | -----CCTTTTGACG | -----AAAGAGAGGA |

|                |            |            |            |            |            |            |
|----------------|------------|------------|------------|------------|------------|------------|
| chr3R_1506433  | AGAGGAAGAC | CAATTTAACA | CCCAACC-AT | AGCTCTAAAC | GAGCTGTCAG | AGACGCGAAG |
| Brazzaville_16 | -----      | -----      | -----      | -----      | -----      | -----      |
| Eden_3         | -----      | -----      | -----      | -----      | -----      | -----      |
| Cann-River_9   | -----      | -----      | -----      | -----      | -----      | -----      |
| Amieu_2        | AGAGGAAGAC | CAATTTAACA | CCCAACC-AT | AGCTCTAAAC | AAGCTGTCAG | AGACGCGAAG |
| Makindu_2      | AAAGGAAGAC | CAATTTAACA | CCCAACA-AT | AGTTTTAAAC | GAGCTGTCAG | AGACGCGAAG |
| Makindu_6      | AAAGGAAGAC | CAATTTAACA | CCCAACA-AT | AGTTTTAAAC | GAGCTGTCAG | AGACGCGAAG |
| Makindu_7      | AAAGGAAGAC | CAATTTAACA | CCCAACA-AT | AGTTTTAAAC | GAGCTGTCAG | AGACGCGAAG |
| Valence_6      | AAAGGAAGAC | CAATTTAACA | CCCAACA-AT | AGTTTTAAAC | GAGCTGTCAG | AGACGCGAAG |
| Makindu_8      | AAAGGAAGAC | CAATTTAACA | CCCAACA-AT | AGTTTTAAAC | GAGCTGTCAG | AGACGCGAAG |
| Makindu_22     | AAAGGAAGAC | CAATTTAACA | CCCAACA-AT | AGTTTTAAAC | GAGCTGTCAG | AGACGCGAAG |
| Canberra_5     | AAAGGAAGAC | CAATTTAACA | CCCAACA-AT | AGTTTTAAAC | GAGCTGTCAG | AGACGCGAAG |
| Cann-River_2   | AAAGGAAGAC | CAATTTAACA | CCCAACA-AT | AGTTTTAAAC | GAGCTGTCAG | AGACGCGAAG |
| Cann-River_6   | AAAGGAAGAC | CAATTTAACA | CCCAACA-AT | AGTTTTAAAC | GAGCTGTCAG | AGACGCGAAG |
| Cann-River_7   | AAAGGAAGAC | CAATTTAACA | CCCAACA-AT | AGTTTTAAAC | GAGCTGTCAG | AGACGCGAAG |
| Cann-River_5   | AAAGGAAGAC | CAATTTAACA | CCCAACA-AT | AGTTTTAAAC | GAGCTGTCAG | AGACGCGAAG |
| Cann-River_8   | AGAGGAAGAC | CAATTTAACA | CCCAACC-AT | AGCTCTAAAC | GAGCTGTCAG | AGACGCGAAG |
| Valence_5      | AAAGGAAGAC | CAATTTAACA | CCCAACA-AT | AGTTTTAAAC | GAGCTGTCAG | AGACGCGAAG |
| Valence_9      | AAAGGAAGAC | CAATTTAACA | CCCAACA-AT | AGTTTTAAAC | GAGCTGTCAG | AGACGCGAAG |
| Eden_1         | AAAGGAAGAC | CAATTTAACA | CCCAACA-AT | AGTTTTAAAC | GAGCTGTCAG | AGACGCGAAG |
| Valence_13     | AAAGGAAGAC | CAATTTAACA | CCCAACA-AT | AGTTTTAAAC | GAGCTGTCAG | AGACGCGAAG |
| Eden_7         | AAAGGAAGAC | CAATTTAACA | CCCAACA-AT | AGTTTTAAAC | GAGCTGTCAG | AGACGCGAAG |
| Valence_4      | AAAGGAAGAC | CAATTTAACA | CCCAACA-AT | AGTTTTAAAC | GAGCTGTCAG | AGACGCGAAG |
| Valence_2      | AAAGGAAGAC | CAATTTAACA | CCCAACA-AT | AGTTTTAAAC | GAGCTGTCAG | AGACGCGAAG |
| Valence_1      | AAAGGAAGAC | CAATTTAACA | CCCAACA-AT | AGTTTTAAAC | GAGCTGTCAG | AGACGCGAAG |
| Valence_7      | AAAGGAAGAC | CAATTTAACA | CCCAACA-AT | AGTTTTAAAC | GAGCTGTCAG | AGACGCGAAG |
| Makindu_cm1    | AAAGGAAGAC | CAATTTAACA | CCCAACA-AT | AGTTTTAAAC | GAGCTGTCAG | AGACGCGAAG |
| Makindu_cm6    | AAAGGAAGAC | CAATTTAACA | CCCAACA-AT | AGTTTTAAAC | GAGCTGTCAG | AGACGCGAAG |
| Makindu_1      | AAAGGAAGAC | CAATTTAACA | CCCAACA-AT | AGTTTTAAAC | GAGCTGTCAG | AGACGCGAAG |
| Amieu_5        | AGAGGAAGAC | CAATTTAACA | CCCAACC-AT | AGCTCTAAAC | GAGCTGTCAG | AGACGCGAAG |
| Eden_11        | AGAGGAAGAC | CAATTTAAAA | CCCCACCCAT | AGCTCTAAAC | GAGCTGTCAG | AGACGCGAAG |
| Cann-River_10  | AGAGGAAGAC | CAATTTAACA | CCCAACC-AT | AGCTCTAAAC | GAGCTGTCAG | AGACGCGAAG |
| Brazzaville_10 | AGAGGAAGAC | CAATTTAACA | CCCAACC-AT | AGCTCTAAAC | GAGCTGTCAG | AGACGCGAAG |
| Cann-River_3   | AGAGGAAGAC | CAATTTAACA | CCCAACC-AT | AGCTCTAAAC | GAGCTGTCAG | AGACGCGAAG |
| Cann-River_13  | AGAGGAAGAC | CAATTTAAAA | CCCCACCCAT | AGCTCTAAAC | GAGCTGTCAG | AGACGCGAAG |
| Eden_4         | AGAGGAAGAC | CAATTTAAAA | CCCCACCCAT | AGCTCTAAAC | GAGCTGTCAG | AGACGCGAAG |
| Makindu_10     | AGAGGAAGAC | CAATTTAAAA | CCCCACCCAT | AGCTCTAAAC | GAGCTGTCAG | AGACGCGAAG |
| Makindu_11     | AGAGGAAGAC | CAATTTAAAA | CCCCACCCAT | AGCTCTAAAC | GAGCTGTCAG | AGACGCGAAG |
| Brazzaville_11 | AAAGGAAGAC | CAATTTAACA | CCCAACA-AT | AGTTTTAAAC | GAGCTGTCAG | AGACGCGAAG |
| Brazzaville_12 | AAAGGAAGAC | CAATTTAACA | CCCAACA-AT | GGTTTTAAAC | GAGCTGTCAG | AGACGCGAAG |
| Brazzaville_8  | AAAGGAAGAC | CAATTTAACA | CCCAACA-AT | AGTTTTAAAC | GAGCTGTCAG | AGACGCGAAG |
| chrU_963982    | AGAGGAAGAC | CAATTTAACA | CCCAACC-AT | AGCTCTAATC | GAGCTGTCAG | AGACGCGAAG |
| chr3L_18642496 | AGAGGAAGAC | CAATTTAACA | CCCAACC-AT | AGCTCTAAAC | GAGCTGTCAG | AGACGCGAAG |
| chrU_3975907   | AGA-----C  | CAATTTAATA | CCCAACC-AT | AGCTCTAAAC | GAGCTGTCAG | AGACGCGAAG |
| chrU_10625041  | -----      | -----      | -----      | -----      | -----      | -----      |
| chrU_2316095   | -----      | -----      | -----      | -----      | -----      | -----      |
| chrU_4537377   | -----      | -----      | -----      | -----      | -----      | -----      |
| chrU_5384045   | -----      | -----      | -----      | -----      | -----      | -----      |
| chrU_5680622   | AGAGGAAGAC | CAA-----   | -CCAACC-AT | AGCTCTAAAC | GAGTTGTCAG | AGACGCGAAG |
| chrU_5950518   | -----      | -----      | -----      | -----      | -----      | -----      |
| chrU_6132643   | AGAGGAAGAC | CAATTTAACA | CCCAACC-AT | AGCTCTAAAC | GAGCTGTCAG | AGACGCGAAG |
| chrX_16602314  | -----      | -----      | -----      | -----      | -----      | -----      |
| chrU_6536133   | AGCGGAGAC  | AAATTTATAA | CCCAACC-AT | AGCGCTAAAA | GAGCTGTCAG | AGACGCGAAG |

|                |            |            |            |             |            |            |
|----------------|------------|------------|------------|-------------|------------|------------|
| chr3R_1506433  | CTGGAGCCAT | ATCCAGCCAT | AAATAGTAAT | TCAAAC TCAA | ACAATAGGTT | TGCCATGCTA |
| Brazzaville_16 | -----      | -----      | -----      | -----       | ---AATCGTT | TGGG-----  |
| Eden_3         | -----      | -----      | -----      | -----       | -----      | -----      |
| Cann-River_9   | CTGGAGCCAT | ATCCAGCCAC | AAATAGTAAT | TCAAAC TCAA | ACAATAGGTT | TGCCATGCTA |
| Amieu_2        | CTGGAGCCAT | ATCCAGCCAC | AAATAGTAAT | TCAAAC TCAA | ACAATAGGTT | TGCCATGCCA |
| Makindu_2      | CTGGAGCCAT | ATCCAGCCAC | AAATAGTAAT | TCAAAC TCAA | ACAATAGGTT | TGCCATGCTA |
| Makindu_6      | CTGGAGCCAT | ATCCAGCCAC | AAATAGTAAT | TCAAAC TCAA | ACAATAGGTT | TGCCATGCTA |
| Makindu_7      | CTGGAGCCAT | ATCCAGCCAC | AAATAGTAAT | TCAAAC TCAA | ACAATAGGTT | TGCCATGCTA |
| Valence_6      | CTGGAGCCAT | ATCCAGCCAC | AAATAGTAAT | TCAAAC TCAA | ACAATAGGTT | TGCCATGCTG |
| Makindu_8      | CTGGAGCCAT | ATCCAGCCAC | AAATAGTAAT | TCAAAC TCAA | ACAATAGGTT | TGCCATGCTA |
| Makindu_22     | CTGGAGCCAT | ATCCAGCCAC | AAATAGTAAT | TCAAAC TCAA | ACAATAGGTT | TGCCATGCTA |
| Canberra_5     | CTGGAGCCAT | ATCCAGCCAC | AAATAGTAAT | TCAAAC TCAA | ACAATAGGTT | TGCCATGCTA |
| Cann-River_2   | CTGGAGCCAT | ATCCAGCCAC | AAATAGTAAT | TCAAAC TCAA | ACAATAGGTT | TGCCATGCTA |
| Cann-River_6   | CTGGAGCCAT | ATCCAGCCAC | AAATAGTAAT | TCAAAC TCAA | ACAATAGGTT | TGCCATGCTA |
| Cann-River_7   | CTGGAGCCAT | ATCCAGCCAC | AAATAGTAAT | TCAAAC TCAA | ACAATAGGTT | TGCCATGCTA |
| Cann_River_5   | CTGGAGCCAT | ATCCAGCCAC | AAATAGTAAT | TCAAAC TCAA | ACAATAGGTT | TGCCATGCTA |
| Cann-River_8   | CTGGAGCCAT | ATCCAGCCAT | AAATAGTAAT | TCAAAC TCAA | ACAATAGGTT | TGCCATGCTA |
| Valence_5      | CTGGAGCCAT | ATCCAGCCAC | AAATAGTAAT | TCAAAC TCAA | ACAATAGGTT | TGCCATGCTG |
| Valence_9      | CTGGAGCCAT | ATCCAGCCAC | AAATAGTAAT | TCAAAC TCAA | ACAATAGGTT | TGCCATGCTG |
| Eden_1         | CTGGAGCCAT | ATCCAGCCAC | AAATAGTAAT | TCAAAC TCAA | ACAATAGGTT | TGCCATGCTA |
| Valence_13     | CTGGAGCCAT | ATCCAGCCAC | AAATAGTAAT | TCAAAC TCAA | ACAATAGGTT | TGCCATGCTG |
| Eden_7         | CTGGAGCCAT | ATCCAGCCAC | AAATAGTAAT | TCAAAC TCAA | ACAATAGGTT | TGCCATGCTA |
| Valence_4      | CTGGAGCCAT | ATCCAGCCAC | AAATAGTAAT | TCAAAC TCAA | ACAATAGGTT | TGCCATGCTG |
| Valence_2      | CTGGAGCCAT | ATCCAGCCAC | AAATAGTAAT | TCAAAC TCAA | ACAATAGGTT | TGCCATGCTG |
| Valence_1      | CTGGAGCCAT | ATCCAGCCAC | AAATAGTAAT | TCAAAC TCAA | ACAATAGGTT | TGCCATGCTG |
| Valence_7      | CTGGAGCCAT | ATCCAGCCAC | AAATAGTAAT | TCAAAC TCAA | ACAATAGGTT | TGCCATGCTG |
| Makindu_cM1    | CTGGAGCCAT | ATCCAGCCAC | AAATAGTAAT | TCAAAC TCAA | ACAATAGGTT | TGCCATGCTG |
| Makindu_cM6    | CTGGAGCCAT | ATCCAGCCAC | AAATAGTAAT | TCAAAC TCAA | ACAATAGGTT | TGCCATGCTG |
| Makindu_1      | CTGGAGCCAT | ATCCAGCCAC | AAATAGTAAT | TCAAAC TCAA | ACAATAGGTT | TGCCATGCTA |
| Amieu_5        | CTGGAGCCAT | ATCCAGCCAT | AAATAGTAAT | TCAAAC TCAA | ACAATAGGTT | TGCCATGCTA |
| Eden_11        | CTGGAGCCAT | ATCCAGCCAC | AAATAGTAAT | TCAAAC TCAA | ACAATAGGTT | TGCCATGCTA |
| Cann-River_10  | CTGGAGCCAT | ATCCAGCCAC | AAATAGTAAT | TCAAAC TCAA | ACAATAGGTT | TGCCATGCCA |
| Brazzaville_10 | CTGGAGCCAT | ATCCAGCCAC | AAATAGTAAT | TCAAAC TCAA | ACAATAGGTT | TGCCATGCCA |
| Cann-River_3   | CTGGAGCCAT | ATCCAGCCAT | AAATAGTAAT | TCAAAC TCAA | ACAATAGGTT | TGCCATGCCA |
| Cann-River_13  | CTGGAGCCAT | ATCCAGCCAC | AAATAGTAAT | TCAAAC TCAA | ACAATAGGTT | TGCCATGCTA |
| Eden_4         | CTGGAGCCAT | ATCCAGCCAC | AAATAGTAAT | TCAAAC TCAA | ACAATAGGTT | TGCCATGCTA |
| Makindu_10     | CTGGAGCCAT | ATCCAGCCAC | AAATAGTAAT | TCAAAC TCAA | ACAATAGGTT | TGCCATGCTA |
| Makindu_11     | CTGGAGCCAT | ATCCAGCCAC | AAATAGTAAT | TCAAAC TCAA | ACAATAGGTT | TGCCATGCTA |
| Brazzaville_11 | CTGGAGCCAT | ATCCAGCCAC | AAATAGTAAT | TCAAAC TCAA | ACAATAGGTT | TGCCATGCTA |
| Brazzaville_12 | CTGGAGCCAT | ATCCAGCCAC | AAATAGTAAT | TCAAAC TCAA | ACAATAGGTT | TGCCATGCTA |
| Brazzaville_8  | CTGGAGCCAT | ATCCAGCCAC | AAATAGTAAT | TCAAAC TCAA | ACAATAGGTT | TGCCATGCTA |
| chrU_963982    | CTGGAGCCAT | ATCCAGCCAC | AAATAGTAAT | TCAAAC TCAA | ACAATAGGCT | TGCCATGCTA |
| chr3L_18642496 | CTGGAGCCAT | ATCCAGCCAT | AAATAGTAAT | TCAAAC TCAA | ACAATAGGTT | TGCCATGCTA |
| chrU_3975907   | CTGGAGCCAT | ATCCAGCCAC | AAATAGTAAT | TCAAAC TCAA | ACAATAGGTT | TGCCATGCTA |
| chrU_10625041  | -----      | -----      | -----      | -----       | -----      | -----      |
| chrU_2316095   | -----      | -----      | -----      | -----       | -----      | -----      |
| chrU_4537377   | -----      | -----      | -----      | -----       | -----      | -----      |
| chrU_5384045   | -----      | -----      | -----      | -----       | -----      | -----      |
| chrU_5680622   | CTGGAGCCAT | ATTCAGCCAC | AAATAGTAAG | TCAAAC TCAA | ACAATTGGAT | GGCCATGCTA |
| chrU_5950518   | -----      | -----      | -----      | -----       | -----      | -----      |
| chrU_6132643   | CTGGAGCCAT | ATCCAGCCAT | AAATAGTAAT | TCAAAC TCAA | ACAATAGGTT | TGCCATGCTA |
| chrX_16602314  | -----      | -----      | -----      | -----       | -----      | -----      |
| chrU_6536133   | CTGGAGCCAT | CCTCAGCAAC | AAATAGGAAG | GCAAACACAA  | ACAATAAGTT | TGCCATGCTA |

|                |            |            |             |            |            |            |
|----------------|------------|------------|-------------|------------|------------|------------|
| chr3R_1506433  | -GACATGGAA | TTGGACGAAA | CCAGTGATGG  | CATAGAAACT | CCACAAGTTT | GTCATGATGT |
| Brazzaville_16 | -----      | -----      | -----       | -----      | -----      | -----      |
| Eden_3         | -----      | -----      | -----       | -----      | -----      | -----      |
| Cann-River_9   | -GACATGGAA | TTGGACGAAA | CCAGTGATGG  | CATAGAAACT | CCACAAGTTT | GTCATGATGT |
| Amieu_2        | TGCCATGGAA | TTGGACGAAA | CCAGTGATGG  | CATAGAAACT | CCACAAGTTT | GTCATGATGC |
| Makindu_2      | -GACATGGAA | TTGGACGAAA | CCAGTGATGG  | CATAGAAACT | CCACAAGTTT | GTCATGATGC |
| Makindu_6      | -GACATGGAA | TTGGACGAAA | CCAGTGATGG  | CATAGAAACT | CCACAAGTTT | GTCATGATGC |
| Makindu_7      | -GACATGGAA | TTGGACGAAA | CCAGTGATGG  | CATAGAAACT | CCACAAGTTT | GTCATGATGC |
| Valence_6      | -GACATGGAA | TTGGACGAAA | CCAGTGATGG  | CATAGAAACT | CCACAAGTTT | GTCATGATGC |
| Makindu_8      | -GACATGGAA | TTGGACGAAA | CCAGTGATGG  | CATAGAAACT | CCACAAGTTT | GTCATGATGC |
| Makindu_22     | -GACATGGAA | TTGGACGAAA | CCAGTGATGG  | CATAGAAACT | CCACAAGTTT | GTCATGATGC |
| Canberra_5     | -GACATGGAA | TTGGACGAAA | CCAGTGATGG  | CATAGAAACT | CCACAAGTTT | GTCATGATGC |
| Cann-River_2   | -GACATGGAA | TTGGACGAAA | CCAGTGATGG  | CATAGAAACT | CCACAAGTTT | GTCATGATGC |
| Cann-River_6   | -GACATGGAA | TTGGACGAAA | CCAGTGATGG  | CATAGAAACT | CCACAAGTTT | GTCATGATGC |
| Cann-River_7   | -GACATGGAA | TTGGACGAAA | CCAGTGATGG  | CATAGAAACT | CCACAAGTTT | GTCATGATGC |
| Cann-River_5   | -GACATGGAA | TTGGACGAAA | CCAGTGATGG  | CATAGAAACT | CCACAAGTTT | GTCATGATGC |
| Cann-River_8   | -GACATGGAA | TTGGACGAAA | CCAGTGATGG  | CATAGAAACT | CCACAAGTTT | GTCATGATGT |
| Valence_5      | -GACATGGAA | TTGGACGAAA | CCAGTGATGG  | CATAGAAACT | CCACAAGTTT | GTCATGATGC |
| Valence_9      | -GACATGGAA | TTGGACGAAA | CCAGTGATGG  | CATAGAAACT | CCACAAGTTT | GTCATGATGC |
| Eden_1         | -GACATGGAA | TTGGACGAAA | CCAGTGATGG  | CATAGAAACT | CCACAAGTTT | GTCATGATGC |
| Valence_13     | -GACATGGAA | TTGGACGAAA | CCAGTGATGG  | CATAGAAACT | CCACAAGTTT | GTCATGATGC |
| Eden_7         | -GACATGGAA | TTGGACGAAA | CCAGTGATGG  | CATAGAAACT | CCACAAGTTT | GTCATGATGC |
| Valence_4      | -GACATGGAA | TTGGACGAAA | CCAGTGATGG  | CATAGAAACT | CCACAAGTTT | GTCATGATGC |
| Valence_2      | -GACATGGAA | TTGGACGAAA | CCAGTGATGG  | CATAGAAACT | CCACAAGTTT | GTCATGATGC |
| Valence_1      | -GACATGGAA | TTGGACGAAA | CCAGTGATGG  | CATAGAAACT | CCACAAGTTT | GTCATGATGC |
| Valence_7      | -GACATGGAA | TTGGACGAAA | CCAGTGATGG  | CATAGAAACT | CCACAAGTTT | GTCATGATGC |
| Makindu_cM1    | -GACATGGAA | TTGGACGAAA | CCAGTGATGG  | CATAGAAACT | CCACAAGTTT | GTCATGATGC |
| Makindu_cM6    | -GACATGGAA | TTGGACGAAA | CCAGTGATGG  | CATAGAAACT | CCACAAGTTT | GTCATGATGC |
| Makindu_1      | -GACATGGAA | TTGGACGAAA | CCAGTGATGG  | CATAGAAACT | CCACAAGTTT | GTCATGATGC |
| Amieu_5        | -GACATGGAA | TTGGACGAAA | CCAGTGATGG  | CATAGAAACT | CCACAAGTTT | GTCATGATGT |
| Eden_11        | -GACATGGAA | TTGGACGAAA | CCAGTGATGG  | CATAGAAACT | CCACAAGTTT | GTCATGATGC |
| Cann-River_10  | TGCCATGGAA | TTGGACGAAA | CCAGTGATGG  | CATAGAAACT | CCACAAGTTT | GTCATGATGC |
| Brazzaville_10 | TGCCATGGAA | TTGGACGAAA | CCAGTGATGG  | CATAGAAACT | CCACAAGTTT | GTCATGATGC |
| Cann-River_3   | -GACATGGAA | TTGGACGAAA | CCAGTGATGG  | CATAGAAACT | CCACAAGTTT | GTCATGATGT |
| Cann-River_13  | -GACATGGAA | TTGGACGAAA | CCAGTGATGG  | CATAGAAACT | CCACAAGTTT | GTCATGATGC |
| Eden_4         | -GACATGGAA | TTGGACGAAA | CCAGTGATGG  | CATAGAAACT | CCACAAGTTT | GTCATGATGC |
| Makindu_10     | -GACATGGAA | TTGGACGAAA | CCAGTGATGG  | CATAGAAACT | CCACAAGTTT | GTCATGATGC |
| Makindu_11     | -GACATGGAA | TTGGACGAAA | CCAGTGATGG  | CATAGAAACT | CCACAAGTTT | GTCATGATGC |
| Brazzaville_11 | -GACATGGAA | TTGGACGAAA | CCAGTGATGG  | CATAGAAACT | CCACAAGTTT | GTCATGATGC |
| Brazzaville_12 | -GACATGGAA | TTGGACGAAA | CCAGTGATGG  | CATAGAAACT | CCACAAGTTT | GTCATGATGC |
| Brazzaville_8  | -GACATGGAA | TTGGACGAAA | CCAGTGATGG  | CATAGAAACT | CCACAAGTTT | GTCATGATGC |
| chrU_963982    | -GACATGGAA | TTGGACGAAA | CCAGTGATGG  | CATAGAAACT | CTACAAATTT | GTCATGATGC |
| chr3L_18642496 | -GACATGGAA | TTGGACGAAA | CCAGTGATGG  | CATAGAAACT | CCACAAGTTT | GTCATGATGT |
| chrU_3975907   | -GACATGGAA | TTGGACGAAA | CCAGTGATGG  | CATAGAAACT | CCACAAGTTT | GTCATGATGC |
| chrU_10625041  | -----      | -----      | -----       | -----      | -----      | -----      |
| chrU_2316095   | -----      | -----      | -----       | -----      | -----      | -----      |
| chrU_4537377   | -----      | -----      | -----       | -----      | -----      | -----      |
| chrU_5384045   | -----      | -----      | -----       | -----      | -----      | -----      |
| chrU_5680622   | -GACATGGAA | TTGGACGAAA | CCAGTGATGG  | CATAGAAACT | CCACAAGTTT | GTAATGATGC |
| chrU_5950518   | -----      | -----      | -----       | -----      | -----      | -----      |
| chrU_6132643   | -GACATGGAA | TTGGACGAAA | CCAGTGATGG  | CATAGAAACT | CCACAAGTTT | GTCATGATGT |
| chrX_16602314  | -----      | -----      | -----       | -----      | -----      | -----      |
| chrU_6536133   | -GACATGGAA | TTGGACGCAA | CCAGTAAATGG | TATAGAAATT | CCACAAGTTT | CTAATGATGG |



|                |            |            |             |            |            |            |
|----------------|------------|------------|-------------|------------|------------|------------|
| chr3R_1506433  | CGCATCCACC | TGGTGTGCAT | CGGCTGCTCC  | GAATATTCCT | AATGATGACT | GTGTACCAAA |
| Brazzaville_16 | -----      | -----      | -----       | -----      | -----      | -----      |
| Eden_3         | -----      | -----      | -----       | -----      | -----      | -----      |
| Cann-River_9   | CGCATCCACC | TGGTGTGCAT | CGGCTGCTCC  | GAATATTCCT | AATGATGACT | GTGTACCTAA |
| Amieu_2        | CGCATCCACC | TGGTGTGCAT | CGGCTGCTCC  | GAATATTCCT | AATGATGACT | GTGTACCAAA |
| Makindu_2      | CGCATCCACC | TGGTGTGCAT | CGGCTGCTCC  | GAAT       | -----      | -----      |
| Makindu_6      | CGCATCCACC | TGGTGTGCAT | CGGCTGCTCC  | GAAT       | -----      | -----      |
| Makindu_7      | CGCATCCACC | TGGTGTGCAT | CGGCTGCTCC  | GAAT       | -----      | -----      |
| Valence_6      | CGCATCCACC | TGGTGTGCAT | CGGCTGCTCC  | GAATATTCCT | AATGATGACT | GTGTCCCAA  |
| Makindu_8      | CGCATCCACC | TGGTGTGCAT | CGGCTGCTCC  | GAAT       | -----      | -----      |
| Makindu_22     | CGCATCCACC | TGGTGTGCAT | CGGCTGCTCC  | GAAT       | -----      | -----      |
| Canberra_5     | CGCATCCACC | TGGTGTGCAT | CGGCTGCTCC  | GAAT       | -----      | -----      |
| Cann-River_2   | CGCATCCACC | TGGTGTGCAT | CGGCTGCTCC  | GAATATTCCT | AATGATGACT | GTGTCCCAA  |
| Cann-River_6   | CGCATCCACC | TGGTGTGCAT | CGGCTGCTCC  | GAATATTCCT | AATGATGACT | GTGTCCCAA  |
| Cann-River_7   | CGCATCCACC | TGGTGTGCAT | CGGCTGCTCC  | GAGTATTCCT | AATGATGACT | GTGTCCCAA  |
| Cann-River_5   | CGCATCCACC | TGGTGTGCAT | CGGCTGCTCC  | GAATATTCCT | AATGATGACT | GTGTCCCAA  |
| Cann-River_8   | CGCATCCACC | TGGTGTGCAT | CGGCTGCTCC  | GAATATTCCT | AATGATGACT | GTGTACCAAA |
| Valence_5      | CGCATCCACC | TGGTGTGCAT | CGGCTGCTCC  | GAATATTCCT | AATGATGACT | GTGTCCCAA  |
| Valence_9      | CGCATCCACC | TGGTGTGCAT | CGGCTGCTCC  | GAATATTCCT | AATGATGACT | GTGTCCCAA  |
| Eden_1         | CGCATCCACC | TGGTGTGCAT | CGGCTGCTCC  | GAATATTCCT | AATGATGACT | GTGTCCCAA  |
| Valence_13     | CGCATCCACC | TGGTGTGCAT | CGGCTGCTCC  | GAATATTCCT | AATGATGACT | GTGTCCCAA  |
| Eden_7         | CGCATCCACC | TGGTGTGCAT | CGGCTGCTCC  | GAATATTCCT | AATGATGACT | GTGTCCCAA  |
| Valence_4      | CGCATCCACC | TGGTGTGCAT | CGGCTGCTCC  | GAATATTCCT | AATGATGACT | GTGTCCCAA  |
| Valence_2      | CGCATCCACC | TGGTGTGCAT | CGGCTGCTCC  | GAATATTCCT | AATGATGACT | GTGTCCCAA  |
| Valence_1      | CGCATCCACC | TGGTGTGCAT | CGGCTGCTCC  | GAATATTCCT | AATGATGACT | GTGTCCCAA  |
| Valence_7      | CGCATCCACC | TGGTGTGCAT | CGGCTGCTCC  | GAATATTCCT | AATGATGACT | GTGTCCCAA  |
| Makindu_cm1    | CGCATCCACC | TGGTGTGCAT | CGGCTGCTCC  | GAATATTCCT | AATGATGACT | GTGTCCCAA  |
| Makindu_cm6    | CGCATCCACC | TGGTGTGCAT | CGGCTGCTCC  | GAATATTCCT | AATGATGACT | GTGTCCCAA  |
| Makindu_1      | CGCATCCACC | TGGTGTGCAT | CGGCTGCTCC  | GAAT       | -----      | -----      |
| Amieu_5        | CGCATCCACC | TGGTGTGCAT | CGGCTGCTCC  | GAATATTCCT | AATGATAACT | GTGTACCAAA |
| Eden_11        | CGCATCCACC | TGGTGTGCAT | CGGCTGCTCC  | GAATATTCCT | AATGATGACT | GTGTACCAAA |
| Cann-River_10  | CGCATCCACC | TGGTGTGCAT | CGGCTGCTCC  | GAATATTCCT | AATGATGACT | GTGTACCAAA |
| Brazzaville_10 | CGCATCCACC | TGGTGTGCAT | CGGCTGCTCC  | GAATATTCCT | AATGATGACT | GTGTACCAAA |
| Cann-River_3   | CGCATCCACC | TGGTGTGCAT | CGGCTGCTCC  | GAATATTCCT | AATGATGACT | GTGAACAAA  |
| Cann-River_13  | CGCATCCACC | TGGTGTGCAC | CGGCTGCTCC  | GAATATTCCT | AATGATGACT | GTGTACCGAA |
| Eden_4         | CGCATCCACC | TGGTGTGCAT | CGGCTGCTCC  | GAATATTCCT | AATGATGACT | GTGTACCAAA |
| Makindu_10     | CGCATCCACC | TGGTGTGCAT | CGGCTGCTCC  | GAATATTCCT | AATGATGACT | GTGTACCAAA |
| Makindu_11     | CGCATCCACC | TGGTGTGCAT | CGGCTGCTCC  | GAATATTCCT | AATGATGACT | GTGTACCAAA |
| Brazzaville_11 | CGCATCCACC | TGGTGTGCAT | CGGCTGCTCC  | GAATATTCCT | AATGATGACT | GTGTCCCAA  |
| Brazzaville_12 | CGCATCCACC | TGGTGTGCAT | CGGCTGCTCC  | GAATATTCCT | AATGATGACT | GTGTCCCAA  |
| Brazzaville_8  | CGCATCCACC | TGGTGTGCAT | CGGCTGCTCC  | GAATATTCCT | AATGATGACT | GTGTCCCAA  |
| chrU_963982    | CGCATCCACC | TGGTGTGCAT | CGGCTGCTTC  | GAATATTCCT | AATGATGACT | GTGTACCAAA |
| chr3L_18642496 | CGCATCCACC | TGGTGTGCAT | CGGCTGCT--  | -----      | -----      | -----      |
| chrU_3975907   | CGCATCCACC | TGGTGTGCAT | CGGCTGCTCC  | GAATATTCCT | AATGATGACT | GTGTACCAAA |
| chrU_10625041  | -----      | -----      | -----       | -----      | -----      | -----      |
| chrU_2316095   | -----      | -----      | -----       | -----      | -----      | -----      |
| chrU_4537377   | -----      | -----      | -----       | -----      | -----      | -----      |
| chrU_5384045   | -----      | -----      | -----       | -----      | -----      | -----      |
| chrU_5680622   | CGCAGCCACC | TGGTGTGCAT | CGGCCGCTCC  | GAATATTCCT | AATGATGACT | GTGTACCAAA |
| chrU_5950518   | -----      | -----      | -----       | -----      | -----      | -----      |
| chrU_6132643   | CGCATCCACC | TGGTGTGCAT | CGGCTGCTCC  | GAATATTCCT | AATGATGACT | GTGTACCAAT |
| chrX_16602314  | CGCATCCACC | TGGTGTGCAT | CGGGTGTCTCC | GAATATTCCT | AATGATGACT | GTGTACCAAA |
| chrU_6536133   | CGCTGCCACC | TTGTGTACAT | TGGCCGCTCC  | AAATATTCCT | AATGATGACT | GCGTACCAAA |

|                |            |            |            |            |            |            |
|----------------|------------|------------|------------|------------|------------|------------|
| chr3R_1506433  | TGTGACATCC | AATAGCCCAC | AACAGTATAC | TGATAAGCAG | AATTCTTATA | AACAATCAAA |
| Brazzaville_16 | -----      | -----      | -----      | -----      | -----      | -----      |
| Eden_3         | -----      | -----      | -----      | -----      | -----      | -----      |
| Cann-River_9   | TGTGACATCC | AATAGCCCAC | AACAGTATAC | TGATAAGCAG | AATTCTTATA | AACAATCAAA |
| Amieu_2        | TGTGACATCC | AATAACCCAC | AACAGTATAC | TGATAAGCAG | AATTCTTATA | AACAATCAAA |
| Makindu_2      | -----      | -----      | -----      | -----      | -----      | --CAATCAA- |
| Makindu_6      | -----      | -----      | -----      | -----      | -----      | --CAATCAA- |
| Makindu_7      | -----      | -----      | -----      | -----      | -----      | --CAATCAA- |
| Valence_6      | TGTGACATCC | AATTGCCCAC | AACAGTATAC | TGATAAGCAG | AATTCTTATA | AACAATCAAA |
| Makindu_8      | -----      | -----      | -----      | -----      | -----      | --CAATCAA- |
| Makindu_22     | -----      | -----      | -----      | -----      | -----      | --CAATCAA- |
| Canberra_5     | -----      | -----      | -----      | -----      | -----      | --CAATCAA- |
| Cann-River_2   | TGTGACATCC | AATAGCCCAC | AACAGTATAC | TGATAAGCAG | AATTCTTATA | AACAATCAAA |
| Cann-River_6   | TGTGACATCC | AATAGCCCAC | AACAGTATAC | TGATAAGCAG | AATTCTTATA | AACAATCAAA |
| Cann-River_7   | TGTGACATCC | AATAGCCCAC | AACAGTATAC | TGATAAGCAG | AATTCTTATA | AACAATCAAA |
| Cann-River_5   | TGTGACATCC | AATAGCCCAC | AACAGTATAC | TGATAAGCAG | AATTCTTATA | AACAATCAAA |
| Cann-River_8   | TGTGACATCC | AATAGCCCAC | AACAGTATAC | TGATAAGCAG | AATTCTTATA | AACAATCAAA |
| Valence_5      | TGTGACATCC | AATTGCCCAC | AACAGTATAC | TGATAAGCAG | AATTCTTATA | AACAATCAAA |
| Valence_9      | TGTGACATCC | AATTGCCCAC | AACAGTATAC | TGATAAGCAG | AATTCTTATA | AACAATCAAA |
| Eden_1         | TGTGACATCC | AATAGCCCAC | AACAGTATAC | TGATAAGCAG | AATTCTTATA | AACAATCAAA |
| Valence_13     | TGTGACATCC | AATTGCCCAC | AACAGTATAC | TGATAAGCAG | AATTCTTATA | AACAATCAAA |
| Eden_7         | TGTGACATCC | AATAGCCCAC | AACAGTATAC | TGATAAGCAG | AATTCTTATA | AACAATCAAA |
| Valence_4      | TGTGACATCC | AATTGCCCAC | AACAGTATAC | TGATAAGCAG | AATTCTTATA | AACAATCAAA |
| Valence_2      | TGTGACATCC | AATTGCCCAC | AACAGTATAC | TGATAAGCAG | AATTCTTATA | AACAATCAAA |
| Valence_1      | TGTGACATCC | AATTGCCCAC | AACAGTATAC | TGATAAGCAG | AATTCTTATA | AACAATCAAA |
| Valence_7      | TGTGACATCC | AATTGCCCAC | AACAGTATAC | TGATAAGCAG | AATTCTTATA | AACAATCAAA |
| Makindu_cM1    | TGTGACATCC | AATTGCCCAC | AACAGTATAC | TGATAAGCAG | AATTCTTATA | AACAATCAAA |
| Makindu_cM6    | TGTGACATCC | AATTGCCCAC | AACAGTATAC | TGATAAGCAG | AATTCTTATA | AACAATCAAA |
| Makindu_1      | -----      | -----      | -----      | -----      | -----      | --CAATCAA- |
| Amieu_5        | TGTGACATCC | AATAGCCCAC | AACAGTATAC | TGATAAGCAG | AATTCTTATA | AACAATCAAA |
| Eden_11        | TGTGACATCC | AATAGCCGAC | AACAGTATAC | TGATAAGCAG | AATTCTTATA | AACAATCAAA |
| Cann-River_10  | TGTGACATCC | AATAACCCAC | AACAGTATAC | TGATAAGCAG | AATTCTTATA | AACAATCAAA |
| Brazzaville_10 | TGTGACATCC | AATAACCCAC | AACAGTATAC | TGATAAGCAG | AATTCTTATA | AACAATCAAA |
| Cann-River_3   | TGTGACATCC | AATAGCCCAC | AACAGTATAC | TGATAAGCAG | AATTCTTATA | AACAATCAAA |
| Cann-River_13  | TGTGACATCC | AATAGCCGAC | AACAGTATAC | TGATAAGCAG | AATTCTTATA | AACAATCAAA |
| Eden_4         | TGTGACTTCC | AATAGCCGAC | AACAGTATAC | TGATAAGCAG | AATTCTTATA | AACAATCAAA |
| Makindu_10     | TGTGACATCC | AATAGCCGAC | AACAGTATAC | TGATAAGCAG | AATTCTTATA | AACAATCAAA |
| Makindu_11     | TGTGACATCC | AATAGCCGAC | AACAGTATAC | TGATAAGCAG | AATTCTTATA | AACAATCAAA |
| Brazzaville_11 | TGTGACATCC | AATAGCCCAC | AACAGTATAC | TGATAAGCAG | AATTCTTATA | AACAATCAAA |
| Brazzaville_12 | TGTGACATCC | AATAGCCCAC | AACAGTATAC | TGATAAGCAG | AATTCTTATA | AACAATCAAA |
| Brazzaville_8  | TGTGACATCC | AATAGCCCAC | AACAGTATAC | TGATAAGCAG | AATTCTTATA | AACAATCAAA |
| chrU_963982    | TGTGACATCC | AATAGCCCAC | AACAGAATAC | TGATAAGCAG | AATTGCTATA | AACAATCAAA |
| chr3L_18642496 | -----      | -----      | -----      | -----      | -----      | -----      |
| chrU_3975907   | TGTGACATCC | AATAACCCAC | AACAGTATAC | TGATAAGCAG | AATTCTTATA | AACAATCAAA |
| chrU_10625041  | -----      | -----      | -----      | -----      | -----      | -----      |
| chrU_2316095   | -----      | -----      | -----      | -----      | -----      | -----      |
| chrU_4537377   | -----      | -----      | -----      | -----      | -----      | -----      |
| chrU_5384045   | -----      | -----      | -----      | -----      | -----      | -----      |
| chrU_5680622   | TGTGACATCC | ACTAGCCCAC | AACAGTATAC | TGATAAGCAG | AATCCTTATA | AACAATCAAA |
| chrU_5950518   | -----      | -----      | -----      | -----      | -----      | -----      |
| chrU_6132643   | TGTGACATCC | AATAGCCCAC | AACAGTATAC | TGATTAACAA | AATTCTTATA | AACAATCAAA |
| chrX_16602314  | TGTGACATCC | AATAGCCCAC | AACAGAATAC | TGATAAGCAG | AATTGCTATA | AACAATCAAA |
| chrU_6536133   | TAAGACATCC | AACAGACCAC | AACAGTATAC | TGATAAGAAG | AATTCTTATA | AACAATCAAA |

|                |             |            |             |            |            |            |
|----------------|-------------|------------|-------------|------------|------------|------------|
| chr3R_1506433  | ACCACCGCAA  | ATAGTACTGA | GCCTTACCAA  | TCTTAATGAT | CTCTATGAGC | TCATTACGGA |
| Brazzaville_16 | -----       | -----      | -----       | -----      | -----      | -----      |
| Eden_3         | -----       | -----      | -----       | -----      | -TTTTTGAGC | TCATTACGGA |
| Cann-River_9   | ACCACCGCAA  | ATAGTACTGA | GCCTTACCAA  | CCTTAATGAT | CTTTTTGAGC | TCATTACGGA |
| Amieu_2        | ACCACCGCAA  | ATAGTACTGA | GCCTTACCAA  | TCTTAATGAT | CTCTATGAGC | TCATTACGGA |
| Makindu_2      | -----       | -----      | -----       | -----      | -----      | -----      |
| Makindu_6      | -----       | -----      | -----       | -----      | -----      | -----      |
| Makindu_7      | -----       | -----      | -----       | -----      | -----      | -----      |
| Valence_6      | ACCACCGCAA  | ATAGTACTGA | GCCTTACCAA  | CCTTAATGAT | CTCTTTGAGC | TCATTACGGA |
| Makindu_8      | -----       | -----      | -----       | -----      | -----      | -----      |
| Makindu_22     | -----       | -----      | -----       | -----      | -----      | -----      |
| Canberra_5     | -----       | -----      | -----       | -----      | -----      | -----      |
| Cann-River_2   | ACCACCGCAA  | ATAGTACTGA | GCCTTACCAA  | CCTTAATGAT | CTCTTTGAGC | TCATTACGGA |
| Cann-River_6   | ACCACCGCAA  | ATAGTACTGA | GCCTTACCAA  | CCTTAATGAT | CTCTTTGAGC | TCATTACGGA |
| Cann-River_7   | ACCACCGCAA  | ATAGTACTGA | GCCTTACCAA  | CCTTAATGAT | CTCTTTGAGC | TCATTACGGA |
| Cann-River_5   | ACCACCGCAA  | ATAGTACTGA | GCCTTACCAA  | CCTTAATGAT | CTCTTTGAGC | TCATTACGGA |
| Cann-River_8   | ACCACCGCAA  | ATAGTACTGA | GCCTTACCAA  | TCTTAATGAT | CTCTATGAGC | TCATTACGGA |
| Valence_5      | ACCACCGCAA  | ATAGTACTGA | GCCTTACCAA  | CCTTAATGAT | CTCTTTGAGC | TCATTACGGA |
| Valence_9      | ACCACCGCAA  | ATAGTACTGA | GCCTTACCAA  | CCTTAATGAT | CTCTTTGAGC | TCATTACGGA |
| Eden_1         | ACCACCGCAA  | ATAGTACTGA | GCCTTACCAA  | CCTTAATGAT | CTCTTTGAGC | TCATTACGGA |
| Valence_13     | ACCACCGCAA  | ATAGTACTGA | GCCTTACCAA  | CCTTAATGAT | CTCTTTGAGC | TCATTACGGA |
| Eden_7         | ACCACCGCAA  | ATAGTACTGA | GCCTTACCAA  | CCTTAATGAT | CTCTTTGAGC | TCATTACGGA |
| Valence_4      | ACCACCGCAA  | ATAGTACTGA | GCCTTACCAA  | CCTTAATGAT | CTCTTTGAGC | TCATTACGGA |
| Valence_2      | ACCACCGCAA  | ATAGTACTGA | GCCTTACCAA  | CCTTAATGAT | CTCTTTGAGC | TCATTACGGA |
| Valence_1      | ACCACCGCAA  | ATAGTACTGA | GCCTTACCAA  | CCTTAATGAT | CTCTTTGAGC | TCATTACGGA |
| Valence_7      | ACCACCGCAA  | ATAGTACTGA | GCCTTACCAA  | CCTTAATGAT | CTCTTTGAGC | TCATTACGGA |
| Makindu_cM1    | ACCACCGCAA  | ATAGTACTGA | GCCTTACCAA  | CCTTAATGAT | CTCTTTGAGC | TCATTACGGA |
| Makindu_cM6    | ACCACCGCAA  | ATAGTACTGA | GCCTTACCAA  | CCTTAATGAT | CTCTTTGAGC | TCATTACGGA |
| Makindu_1      | -----       | -----      | -----       | -----      | -----      | -----      |
| Amieu_5        | ACCACCGCAA  | ATAGTACTGA | GCCTTACCAA  | TCTTAATGAT | CTCTATGAGC | TCATTACGGA |
| Eden_11        | ACCACCGCAA  | ATAGTACTGA | GCCTTACCAA  | CCTTAATGAT | CTCTTTGAGC | TCATTACGGA |
| Cann-River_10  | ACCACCGCAA  | ATAGTACTGA | GCCTTACCAG  | CCTTAATGAT | CTCTTTGAGC | TCATTACTGA |
| Brazzaville_10 | ACCACCGCAA  | ATAGTACTGA | GCCTTACCAG  | CCTTAATGAT | CTCTTTGAGC | TCATTACTGA |
| Cann-River_3   | ACCACCGCAA  | ATAGTACTGA | GCCTTACCAA  | TCTTAATGAT | CTCTATGAGC | TCATTACGGA |
| Cann-River_13  | ACCACCGCAA  | ATAGTACTGA | GCCTTACCAA  | CCTTAATGAT | CTCTTTGAGC | TCATTACGGA |
| Eden_4         | ACCACCGCAA  | ATAGTACTGA | GCCTTACCAA  | CCTTAATGAT | CTCTTTGAGC | TCATTACGGA |
| Makindu_10     | ACCACCGCAA  | ATAGTACTGA | GCCTTACCAA  | CCTTAATGAT | CTCTTTGAGC | TCATTACGGA |
| Makindu_11     | ACCACCGCAA  | ATAGTACTGA | GCCTTACCAA  | CCTTAATGAT | CTCTTTGAGC | TCATTACGGA |
| Brazzaville_11 | ACCACCGCAA  | ATAGTACTGA | GCCTTACCAA  | CCTTAATGAT | CTCTTTGAGC | TCATTACGGA |
| Brazzaville_12 | ACCACCGCAA  | ATAGTACTGA | GCCTTACCAA  | CCTTAATGAT | CTCTTTGAGC | TCATTACGGA |
| Brazzaville_8  | ACCACCGCAA  | ATAGTACTGA | GCCTTACCAA  | CCTTAATGAT | CTCTTTGAGC | TCATTACGGA |
| chrU_963982    | ACCACCGCAA  | ATAGTACTGA | GCCTTACCAA  | CCTTAATGAT | CTCTTTGAGC | TCATTACGGA |
| chr3L_18642496 | -----       | -----      | -----       | -----      | -----      | -----      |
| chrU_3975907   | ACCACCGCAA  | ATAGTACTGA | CCCTTACCAA  | CCTTAATGAT | CTCTTTGAGC | TCATTACGGA |
| chrU_10625041  | -----       | -----      | -----       | -----      | -----      | -----      |
| chrU_2316095   | -----       | -----      | -----       | -----      | -----      | -----      |
| chrU_4537377   | -----       | -----      | -----       | -----      | ---TGAGC   | TCATTACGGA |
| chrU_5384045   | -----       | -----      | -----       | -----      | -----      | -----      |
| chrU_5680622   | ACCACCGCAA  | ATAGTACTGA | GCCTTACTAA  | CCTTAATGAA | CTCTTTGAGC | TCATTACG-A |
| chrU_5950518   | -----       | -----      | -----       | -----      | -----      | -----      |
| chrU_6132643   | ACCACC----- | -----      | -----       | -----      | -----      | -----      |
| chrX_16602314  | ACCACCGCAA  | ATAGTACTGA | GCCTTACCAA  | CCTTAATGAT | CTCTTTGAGC | TCATTACGGA |
| chrU_6536133   | ACCACCGCAA  | ATAGAACTGC | GAAATTACCAA | CCTTAATGAT | CTCTTTG--C | TCATTACGGA |

|                |            |             |            |            |            |            |
|----------------|------------|-------------|------------|------------|------------|------------|
| chr3R_1506433  | GGT-CACTAG | CCTAGATAAAT | TTAACAGTTA | AAGTCAATCA | AGGGGAAACA | GTGAGAATAT |
| Brazzaville_16 | -----      | -----       | -----      | -----      | -----      | -----      |
| Eden_3         | GGC-CACTAA | CCTAGATAAAT | TTAACAGTTA | AAGTCAATCA | AGGAGAAACA | GTGAGAATAT |
| Cann-River_9   | GGC-CACTAA | CCTAGATAAAT | TTAACAGTTA | AAGTCAATCA | AGGAGAAACA | GTGAGAATAT |
| Amieu_2        | GGT-CACTAG | CCTAGATAAAT | TTAACAGTTA | AAGTCAATCA | AGGGGAAACA | GTGAGAATAT |
| Makindu_2      | -----      | -----       | -----      | --GTCAATCA | AGGGGAAACA | GTGAGAATAT |
| Makindu_6      | -----      | -----       | -----      | --GTCAATCA | AGGGGAAACA | GTGAGAATAT |
| Makindu_7      | -----      | -----       | -----      | --GTCAATCA | AGGGGAAACA | GTGAGAATAT |
| Valence_6      | GGT-CACTAG | CCTAGATAAAT | TTAACAGTTA | AAGTCAATCA | AGGGGAAACA | GTGAGAATAT |
| Makindu_8      | -----      | -----       | -----      | --GTCAATCA | AGGGGAAACA | GTGAGAATAT |
| Makindu_22     | -----      | -----       | -----      | --GTCAATCA | AGGGGAAACA | GTGAGAATAT |
| Canberra_5     | -----      | -----       | -----      | --GTCAATCA | AGGGGAAACA | GTGAGAATAT |
| Cann-River_2   | GGT-CACTAG | CCTAGATAAAT | TTAACAGTTA | AAGTCAATCA | AGGGGAAACA | GTGAGAATAT |
| Cann-River_6   | GGT-CACTAG | CCTAGATAAAT | TTAACAGTTA | AAGTCAATCA | AGGGGAAACA | GTGAGAATAT |
| Cann-River_7   | GGT-CACTAG | CCTAGATAAAT | TTAACAGTTA | AAGTCAATCA | AGGGGAAACA | GTGAGAATAT |
| Cann-River_5   | GGT-CACTAG | CCTAGATAAAT | TTAACAGTTA | AAGTCAATCA | AGGGGAAACA | GTGAGAATAT |
| Cann-River_8   | GGT-CACTAG | CCTAGATAAAT | TTAACAGTTA | AAGTCAATCA | AGGGGAAACA | GTGAGAATAT |
| Valence_5      | GGT-CACTAG | CCTAGATAAAT | TTAACAGTTA | AAGTCAATCA | AGGGGAAACA | GTGAGAATAT |
| Valence_9      | GGT-CACTAG | CCTAGATAAAT | TTAACAGTTA | AAGTCAATCA | AGGGGAAACA | GTGAGAATAT |
| Eden_1         | GGT-CACTAG | CCTAGATAAAT | TTAACAGTTA | AAGTCAATCA | AGGGGAAACA | GTGAGAATAT |
| Valence_13     | GGT-CACTAG | CCTAGATAAAT | TTAACAGTTA | AAGTCAATCA | AGGGGAAACA | GTGAGAATAT |
| Eden_7         | GGT-CACTAG | CCTAGATAAAT | TTAACAGTTA | AAGTCAATCA | AGGGGAAACA | GTGAGAATAT |
| Valence_4      | GGT-CACTAG | CCTAGATAAAT | TTAACAGTTA | AAGTCAATCA | AGGGGAAACA | GTGAGAATAT |
| Valence_2      | GGT-CACTAG | CCTAGATAAAT | TTAACAGTTA | AAGTCAATCA | AGGGGAAACA | GTGAGAATAT |
| Valence_1      | GGT-CACTAG | CCTAGATAAAT | TTAACAGTTA | AAGTCAATCA | AGGGGAAACA | GTGAGAATAT |
| Valence_7      | GGT-CACTAG | CCTAGATAAAT | TTAACAGTTA | AAGTCAATCA | AGGGGAAACA | GTGAGAATAT |
| Makindu_cm1    | GGT-CACTAG | CCTAGATAAAT | TTAACAGTTA | AAGTCAATCA | AGGGGAAACA | GTGAGAATAT |
| Makindu_cm6    | GGT-CACTAG | CCTAGATAAAT | TTAACAGTTA | AAGTCAATCA | AGGGGAAACA | GTGAGAATAT |
| Makindu_1      | -----      | -----       | -----      | --GTCAATCA | AGGGGAAACA | GTGAGAATAT |
| Amieu_5        | GGT-CACTAG | CCTAGATAAAT | TTAACAGTTA | AAGTCAATCA | AGGGGAAACA | GTGAGAATAT |
| Eden_11        | GGT-CACTAG | CCTAGATAAAT | TTAACAGTTA | AAGTCAATCA | AGGAAAAACA | GTGAGAATAT |
| Cann-River_10  | GGT-CACTAG | CATAGATAAAT | TTAACAGTTA | AAGTCAATCA | AGGGGAAGCA | GTGAGAATAT |
| Brazzaville_10 | GGT-CACTAG | CATAGATAAAT | TTAACAGTTA | AAGTCAATCA | AGGGGAAGCA | GTGAGAATAT |
| Cann-River_3   | GGT-CACTAG | CCTAGATAAAT | TTAACAGTTA | AAGTCAATCA | AGGGGAAACA | GTGAGAATAT |
| Cann-River_13  | GGT-CACTAG | CCTAGATAAAT | TTAACAGTTA | AAGTCAATCA | AGGAAAAACA | GTGAGAATAT |
| Eden_4         | GGT-CACTAG | CATAGATAAAT | TTAACAGTTA | AAGTCAATCA | AGGAAAAACA | GTGAGAATAT |
| Makindu_10     | GGT-CACTAG | CCTAGATAAAT | TTAACAGTTA | AAGTCAATCA | AGGAAAAACA | GTGAGAATAT |
| Makindu_11     | GGT-CACTAG | CCTAGATAAAT | TTAACAGTTA | AAGTCAATCA | AGGAAAAACA | GTGAGAATAT |
| Brazzaville_11 | gGT-CACTAG | CCTAGATAAAT | TTAACAGTTA | AAGTCAATCA | AGGGGAAACA | GTGAGAATAT |
| Brazzaville_12 | GGT-CACTAG | CCTAGATAAAT | TTAACAGTTA | AAGTCAATCA | AGGGGAAACA | GTGAGAATAT |
| Brazzaville_8  | GGT-CACTAG | CCTAGATAAAT | TTAACAGTTA | AAGTCAATCA | AGGGGAAACA | GTGAGAATAT |
| chrU_963982    | GGT-CACTAG | CCTAGATAAAT | TTAACAGTTA | AAGTCAATCA | AGGAGAAACA | GTGAGAATAA |
| chr3L_18642496 | -----      | -----       | -----      | -----      | -----      | -----      |
| chrU_3975907   | GGT-CACTAG | CATAAATAAT  | TTAACAGTTA | AAGTCAATCA | AGGGGA     | -----      |
| chrU_10625041  | -----      | -----       | -----      | -----      | -----      | -----      |
| chrU_2316095   | -----      | -----       | -----      | -----      | -----      | -----      |
| chrU_4537377   | GGTTCATCAC | CCTAGGTAAT  | TAACCAGTAA | AGGTCAATCA | GGGGGAAACA | GGAGAAATTT |
| chrU_5384045   | -----      | -----       | -----      | -----      | -----      | -----      |
| chrU_5680622   | GAT-CACTAG | CCTAGATA    | -----      | -----      | -----      | -----      |
| chrU_5950518   | -----      | -----       | -----      | -----      | -----      | -----      |
| chrU_6132643   | -----      | -----       | -----      | -----      | -----      | -----      |
| chrX_16602314  | GGT-CACTAG | ACTAGATAAAT | TTAACAGTTA | AAGTCAATCA | AGGAGAAACA | GTGAGAATAT |
| chrU_6536133   | GGT-CACTAG | CCTAGATAAAT | ATAA       | -----      | -----      | ----GAATAT |

|                |             |            |             |            |             |             |
|----------------|-------------|------------|-------------|------------|-------------|-------------|
| chr3R_1506433  | TACCCAAA-G  | ACTCTGATAC | TTACAGAGCT  | ATTGTTAATC | TTTTTGGATAA | TTCCGGGAATT |
| Brazzaville_16 | -----       | -----      | -----       | -----      | -----ATAA   | TTCCGGGAATT |
| Eden_3         | TACCCAAA-G  | ACGCTGATAC | TTATAGAGCC  | ATTGTTAATC | TTTTGGATAA  | TTCCGGGAATT |
| Cann-River_9   | TACCCAAA-G  | ACGCTGATAC | TTATAGAGCC  | ATTGTTAATC | TTTTGGATAA  | TTCCGGGAATT |
| Amieu_2        | TACCCAAA-G  | ACTCTGATAC | TTACAGAGCT  | ATTGTTAATC | TTTTTGGATAA | TTCCGGGAATT |
| Makindu_2      | TACCCAAA-G  | ACGCTGATAC | TTATAGAGCC  | ATTGTGAATC | GTTTGGATAA  | TTCCGGGAATT |
| Makindu_6      | TACCCAAA-G  | ACGCTGATAC | TTATAGAGCC  | ATTGTGAATC | GTTTGGATAA  | TTCCGGGAATT |
| Makindu_7      | TACCCAAA-G  | ACGCTGATAC | TTATAGAGCC  | ATTGTGAATC | GTTTGGATAA  | TTCCGGGAATT |
| Valence_6      | TACCCAAA-G  | ACGCTGATAC | TTATAGAGCC  | ATTGTGAATC | TTTTGGATAA  | TTCCGGGAATT |
| Makindu_8      | TACCCAAA-G  | ACGCTGATAC | TTATAGAGCC  | ATTGTGAATC | GTTTGGATAA  | TTCCGGGAATT |
| Makindu_22     | TACCCAAA-G  | ACGCTGATAC | TTATAGAGCC  | ATTGTGAATC | GTTTGGATAA  | TTCCGGGAATT |
| Canberra_5     | TACCCAAA-G  | ACGCTGATAC | TTATAGAGCC  | ATTGTGAATC | GTTTGGATAA  | TTCCGGGAATT |
| Cann-River_2   | TACCCAAA-G  | ACGCTGATAC | TTATAGAGCC  | ATTGTGAATC | GTTTGGATAA  | TTCCGGGAATT |
| Cann-River_6   | TACCCAAA-G  | ACGCTGATAC | TTATAGAGCC  | ATTGTGAATC | GTTTGGATAA  | TTCCGGGAATT |
| Cann-River_7   | TACCCAAA-G  | ACGCTGATAC | TTATAGAGCC  | ATTGTGAATC | GTTTGGATAA  | TTCCGGGAATT |
| Cann-River_5   | TACCCAAAG-G | ACGCTGATAC | TTATAGAGCC  | ATTGTGAATC | GTTTGGATAA  | TTCCGGGAATT |
| Cann-River_8   | TACCCAAA-G  | ACTCTGATAC | TTACAGAGCT  | ATTGTTAATC | TTTTTGGATAA | TTCCGGGAATT |
| Valence_5      | TACCCAAA-G  | ACGCTGATAC | TTATAGAGCC  | ATTGTGAATC | TTTTGGATAA  | TTCCGGGAATT |
| Valence_9      | TACCCAAA-G  | ACGCTGATAC | TTATAGAGCC  | ATTGTGAATC | TTTTGGATAA  | TTCCGGGAATT |
| Eden_1         | TACCCAAA-G  | ACGCTGATAC | TTATAGAGCC  | ATTGTGAATC | GTTTGGATAA  | TTCCGGGAATT |
| Valence_13     | TACCCAAA-G  | ACGCTGATAC | TTATAGAGCC  | ATTGTGAATC | TTTTGGATAA  | TTCCGGGAATT |
| Eden_7         | TACCCAAA-G  | ACGCTGATAC | TTATAGAGCC  | ATTGTGAATC | GTTTGGATAA  | TTCCGGGAATT |
| Valence_4      | TACCCAAA-G  | ACGCTGATAC | TTATAGAGCC  | ATTGTGAATC | TTTTGGATAA  | TTCCGGGAATT |
| Valence_2      | TACCCAAA-G  | ACGCTGATAC | TTATAGAGCC  | ATTGTGAATC | TTTTGGATAA  | TTCCGGGAATT |
| Valence_1      | TACCCAAA-G  | ACGCTGATAC | TTATAGAGCC  | ATTGTGAATC | TTTTGGATAA  | TTCCGGGAATT |
| Valence_7      | TACCCAAA-G  | ACGCTGATAC | TTATAGAGCC  | ATTGTGAATC | TTTTGGATAA  | TTCCGGGAATT |
| Makindu_cM1    | TACCCAAA-G  | ACGCTGATAC | TTATAGAGCC  | ATTGTGAATC | TTTTGGATAA  | TTCCGGGAATT |
| Makindu_cM6    | TACCCAAA-G  | ACGCTGATAC | TTATAGAGCC  | ATTGTGAATC | TTTTGGATAA  | TTCCGGGAATT |
| Makindu_1      | TACCCAAA-G  | ACGCTGATAC | TTATAGAGCC  | ATTGTGAATC | GTTTGGATAA  | TTCCGGGAATT |
| Amieu_5        | TACCCAAA-G  | ACTCTGATAC | TTACAGAGCT  | ATTGTTAATC | TTTTTGGATAA | TTCCGGGAATT |
| Eden_11        | TACCCAAA-G  | ACGCTGATAC | TTATAGAGCC  | ATTGTTAATC | TTTTGGATAA  | TTCCGGGAATT |
| Cann-River_10  | TACCCAAA-G  | ACGCTGATAC | TTATAGAGCC  | ATTGTTAATC | TTTTGGATAA  | TTCCGGGAATT |
| Brazzaville_10 | TACCCAAA-G  | ACGCTGATAC | TTATAGAGCC  | ATTGTTAATC | TTTTGGATAA  | TTCCGGGAATT |
| Cann-River_3   | TGCCCAAA-G  | ACTCTGATAC | TTGACAGAGCT | ATTGTTAATC | TTTTTGGATAA | TTCCGGGAATT |
| Cann-River_13  | TACCCAAA-G  | ACGCTGATAC | TTATAGAGCC  | ATTGTTAATC | TTTTGGATAA  | TTCCGGGAATT |
| Eden_4         | TACCCAAA-G  | ACGCTGATAC | TTATAGAGCC  | ATTGTTAATC | TTTTGGATAA  | TTCCGGGAATT |
| Makindu_10     | TACCCAAA-G  | ACGCTGATAC | TTATAGAGCC  | ATTGTTAATC | TTTTGGATAA  | TTCCGGGAATT |
| Makindu_11     | TACCCAAA-G  | ACGCTGATAC | TTATAGAGCC  | ATTGTTAATC | TTTTGGATAA  | TTCCGGGAATT |
| Brazzaville_11 | TACCCAAA-G  | ACGCTGATAC | TTATAGAGCC  | ATTGTGAATC | GTTTGGATAA  | TTCCGGGAATT |
| Brazzaville_12 | TACCCAAA-G  | ACGCTGATAC | TTATAGAGCC  | ATTGTGAATC | GTTTGGATAA  | TTCCGGGAATT |
| Brazzaville_8  | TACCCAAA-G  | ACGCTGATAC | TTATAGAGCC  | ATTGTGAATC | GTTTGGATAA  | TTCCGGGAATT |
| chrU_963982    | TACCCAAA-G  | ACGCTGATAC | TTATAGAACC  | ATTGTTAATC | TTTTGGATAA  | TTCCGGGAATT |
| chr3L_18642496 | -----       | -----      | -----       | -----      | -----       | -----       |
| chrU_3975907   | -----       | -----      | -----       | -----      | -----       | -----       |
| chrU_10625041  | -----       | -----      | -----       | -----      | -----       | -----       |
| chrU_2316095   | -----       | -----      | -----       | -----      | -----       | -----       |
| chrU_4537377   | TACCCAAAAG  | ATTCTGAAAT | TACCAGAGTT  | ATTGTTATTG | TTTTTGGATAA | TTCCGGTAAGT |
| chrU_5384045   | -----       | -----      | -----       | -----      | -----       | -----       |
| chrU_5680622   | -----       | -----      | -----       | -----      | -----       | -----       |
| chrU_5950518   | -----       | -----      | -----       | -----      | -----       | -----       |
| chrU_6132643   | -----       | -----      | -----       | -----      | -----       | -----       |
| chrX_16602314  | TACCC-----  | -----      | -----       | -----      | -----       | -----       |
| chrU_6536133   | TTCCCAAA-G  | ACGTTGATAC | TTATAGAGCC  | ATTGTTAATT | CTTTGGATAG  | TTCCGGGAATT |

|                |            |             |            |            |            |            |
|----------------|------------|-------------|------------|------------|------------|------------|
| chr3R_1506433  | GAATTCATA  | CGTACCAAAAT | GAAGGAAGAG | AAGCCTCACA | GAATAGTTGT | TAAGGGACTC |
| Brazzaville_16 | GAATTCATA  | CGTACCAAAAT | GAAGGAAGAG | AAGTCTCACA | AAATAGTTGT | TAAGGGACTC |
| Eden_3         | GAGTTCCATA | CGTACCAAAAT | TAAGGATGAG | AAGCCTCACA | GAATAGTTGT | TAAGGGACTC |
| Cann-River_9   | GAGTTCCATA | CGTACCAAAAT | TAAGGATGAG | AAGCCTCACA | GAATAGTTGT | TAAGGGACTC |
| Amieu_2        | GAATTCATA  | CgTACCAAAAT | GAAGGAAGAG | AAGCCTCACA | GAATAGTTGT | TAAGGGACTC |
| Makindu_2      | GAATTCATA  | CGTACCAAAAT | GAAGGAAGAG | AAGTCTCACA | AAATAGTTGT | TAAGGGACTC |
| Makindu_6      | GAATTCATA  | CGTACCAAAAT | GAAGGAAGAG | AAGTCTCACA | AAATAGTTGT | TAAGGGACTC |
| Makindu_7      | GAATTCATA  | CGTACCAAAAT | GAAGGAAGAG | AAGTCTCACA | AAATAGTTGT | TAAGGGACTC |
| Valence_6      | GAATTCATA  | CGTACCAAAAT | GAAGGAAGAG | AAGTCTCACA | AAATAGTTGT | TAAGGGACTC |
| Makindu_8      | GAATTCATA  | CGTACCAAAAT | GAAGGAAGAG | AAGTCTCACA | AAATAGTTGT | TAAGGGACTC |
| Makindu_22     | GAATTCATA  | CGTACCAAAAT | GAAGGAAGAG | AAGTCTCACA | AAATAGTTGT | TAAGGGACTC |
| Canberra_5     | GAATTCATA  | CGTACCAAAAT | GAAGGAAGAG | AAGTCTCACA | AAATAGTTGT | TAAGGGACTC |
| Cann-River_2   | GAATTCATA  | CGTACCAAAAT | GAAGGAAGAG | AAGTCTCACA | AAATAGTTGT | TAAGGGACTC |
| Cann-River_6   | GAATTCATA  | CGTACCAAAAT | GAAGGAAGAG | AAGTCTCACA | AAATAGTTGT | TAAGGGACTC |
| Cann-River_7   | GAATTCATA  | CGTACCAAAAT | GAAGGAAGAG | AAGTCTCACA | AAATAGTTGT | TAAGGGACTC |
| Cann_River_5   | GAATTCATA  | CGTACCAAAAT | GAAGGAAGAG | AAGTCTCACA | AAATAGTTGT | TAAGGGACTC |
| Cann-River_8   | GAATTCATA  | CGTACCAAAAT | GAAGGAAGAG | AAGCCTCACA | GAATAGTTGT | TAAGGGACTC |
| Valence_5      | GAATTCATA  | CGTACCAAAAT | GAAGGAAGAG | AAGTCTCACA | AAATAGTTGT | TAAGGGACTC |
| Valence_9      | GAATTCATA  | CGTACCAAAAT | GAAGGAAGAG | AAGTCTCACA | AAATAGTTGT | TAAGGGACTC |
| Eden_1         | GAATTCATA  | CGTACCAAAAT | GAAGGAAGAG | AAGTCTCACA | AAATAGTTGT | TAAGGGACTC |
| Valence_13     | GAATTCATA  | CGTACCAAAAT | GAAGGAAGAG | AAGTCTCACA | AAATAGTTGT | TAAGGGACTC |
| Eden_7         | GAATTCATA  | CGTACCAAAAT | GAAGGAAGAG | AAGTCTCACA | AAATAGTTGT | TAAGGGACTC |
| Valence_4      | GAATTCATA  | CGTACCAAAAT | GAAGGAAGAG | AAGTCTCACA | AAATAGTTGT | TAAGGGACTC |
| Valence_2      | GAATTCATA  | CGTACCAAAAT | GAAGGAAGAG | AAGTCTCACA | AAATAGTTGT | TAAGGGACTC |
| Valence_1      | GAATTCATA  | CGTACCAAAAT | GAAGGAAGAG | AAGTCTCACA | AAATAGTTGT | TAAGGGACTC |
| Valence_7      | GAATTCATA  | CGTACCAAAAT | GAAGGAAGAG | AAGTCTCACA | AAATAGTTGT | TAAGGGACTC |
| Makindu_cM1    | GAATTCATA  | CGTACCAAAAT | GAAGGAAGAG | AAGTCTCACA | AAATAGTTGT | TAAGGGACTC |
| Makindu_cM6    | GAATTCATA  | CGTACCAAAAT | GAAGGAAGAG | AAGTCTCACA | AAATAGTTGT | TAAGGGACTC |
| Makindu_1      | GAATTCATA  | CGTACCAAAAT | GAAGGAAGAG | AAGTCTCACA | AAATAGTTGT | TAAGGGACTC |
| Amieu_5        | GAATTCATA  | CGTACCAAAAT | GAAGGAAGAG | AAGCCTCACA | GAATAGTTGT | TAAGGGACTC |
| Eden_11        | GAATTCATA  | CGTACCAAAAT | GAAGGAAGAG | AAGCCTCACA | GAATAGTTGT | TAAGGGACTC |
| Cann-River_10  | GAATTCATA  | CGTACCAAAAT | GAAGGAAGAG | AAGCCTCACA | GAATAGTTGT | TAAGGGACTC |
| Brazzaville_10 | GAATTCATA  | CGTACCAAAAT | GAAGGAAGAG | AAGCCTCACA | GAATAGTTGT | TAAGGGACTC |
| Cann-River_3   | GAATTCATA  | CGTACCAAAAT | GAAGGAAGAG | AAGCCTCACA | GAATAGTTGT | TAAGGGACTC |
| Cann-River_13  | GAATTCATA  | CGTACCAAAAT | GAAGGAAGAG | AAGCCTCACA | GAATAGTTGT | TAAGGGACTC |
| Eden_4         | GAATTCATA  | CGTACCAAAAT | GAAGGAAGAG | AAGCCTCACA | GAATAGTTGT | TAAGGGACTC |
| Makindu_10     | GAATTCATA  | CGTACCAAAAT | GAAGGAAGAG | AAGCCTCACA | GAATAGTTGT | TAAGGGACTC |
| Makindu_11     | GAATTCATA  | CGTACCAAAAT | GAAGGAAGAG | AAGCCTCACA | GAATAGTTGT | TAAGGGACTC |
| Brazzaville_11 | GAATTCATA  | CGTACCAAAAT | GAAGGAAGAG | AAGTCTCACA | AAATAGTTGT | TAAGGGACTC |
| Brazzaville_12 | GAATTCATA  | CGTACCAAAAT | GAAGGAAGAG | AAGTCTCACA | AAATAGTTGT | TAAGGGACTC |
| Brazzaville_8  | GAATTCATA  | CGTACCAAAAT | GAAGGAAGAG | AAGTCTCACA | AAATAGTTGT | TAAGGGACTC |
| chrU_963982    | GAATTCATA  | CGTACCAAAAT | GAAGGAAGAG | AAGCCTCACA | GAATAGTTGT | TAAGGGACTT |
| chr3L_18642496 | -----      | -----       | -----      | -----      | -----      | -----      |
| chrU_3975907   | -----      | -----       | -----      | -----      | -----      | -----      |
| chrU_10625041  | -----      | -----       | -----      | -----      | -----      | -----      |
| chrU_2316095   | -----      | -----       | -----      | -----      | -----      | -----      |
| chrU_4537377   | GAATTCATA  | CGTACCAAAAT | GAAGGAAGAG | AAGCCTCACA | GAGTAGTTGT | TAAGGGACTC |
| chrU_5384045   | -----      | -----       | -----      | -----      | -----      | -----      |
| chrU_5680622   | -----      | -----       | -----      | -----      | -----      | -----      |
| chrU_5950518   | -----      | -----       | -----      | -----      | -----      | -----      |
| chrU_6132643   | -----      | -----       | -----      | -----      | -----      | -----      |
| chrX_16602314  | -----      | -----       | -----      | -----      | -----      | -----      |
| chrU_6536133   | GAATTCATA  | CGTAC       | -----      | -----      | -----      | -----      |

|                |            |            |            |            |            |            |
|----------------|------------|------------|------------|------------|------------|------------|
| chr3R_1506433  | CACCATAGCA | CCCTAACCTA | CGAAATTATC | GACAACTTTA | AAACATATGG | -CTTTGATGT |
| Brazzaville_16 | CACCATGGCA | CCCTAACCTA | CGAAATTATC | GACAACTTTA | AAACATATGG | -CTTTGATGT |
| Eden_3         | CACCATAGCA | CCCTAACCTA | CGAAATTATC | GACAACTTTA | AAACATATGG | -CTTTGATAT |
| Cann-River_9   | CACCATAGCA | CCCTAACCTA | CGAAATTATC | GACAACTTTA | AAACATATGG | -CTTTGATAT |
| Amieu_2        | CACCATAGCA | CCCTAACCTA | CGAAATTATC | GACAACTTTA | AAACATATGG | -CTTTGATGT |
| Makindu_2      | CACCATGGCA | CCCTAACCTA | CGAAATTATC | GACAACTTTA | AAACATATGG | -CTTTGATGT |
| Makindu_6      | CACCATGGCA | CCCTAACCTA | CGAAATTATC | GACAACTTTA | AAACATATGG | -CTTTGATGT |
| Makindu_7      | CACCATGGCA | CCCTAACCTA | CGAAATTATC | GACAACTTTA | AAACATATGG | -CTTTGATGT |
| Valence_6      | CACCATGGCA | CCCTAACCTA | CGAAATTATC | GACAACTTTA | AAACATATGG | -CTTTGATGT |
| Makindu_8      | CACCATGGCA | CCCTAACCTA | CGAAATTATC | GACAACTTTA | AAACATATGG | -CTTTGATGT |
| Makindu_22     | CACCATGGCA | CCCTAACCTA | CGAAATTATC | GACAACTTTA | AAACATATGG | -CTTTGATGT |
| Canberra_5     | CACCATGGCA | CCCTAACCTA | CGAAATTATC | GACAACTTTA | AAACATATGG | -CTTTGATGT |
| Cann-River_2   | CACCATGGCA | CCCTAACCTA | CGAAATTATC | GACAACTTTA | AAACATATGG | -CTTTGATGT |
| Cann-River_6   | CACCATGGCA | CCCTAACCTA | CGAAATTATC | GACAACTTTA | AAACATATGG | -CTTTGATGT |
| Cann-River_7   | CACCATGGCA | CCCTAACCTA | CGAAATTATC | GACAACTTTA | AAACATATGG | -CTTTGATGT |
| Cann_River_5   | CACCATGGCA | CCCTAACCTA | CGAAATTATC | GACAACTTTA | AAACATATGG | -CTTTGATGT |
| Cann-River_8   | CACCATAGCA | CCCTAACCTA | CGAAATTATC | GACAACTTTA | AA-CATATGG | -CTTTGATGT |
| Valence_5      | CACCATGGCA | CCCTAACCTA | CGAAATTATC | GACAACTTTA | AAACATATGG | -CTTTGATGT |
| Valence_9      | CACCATGGCA | CCCTAACCTA | CGAAATTATC | GACAACTTTA | AAACATATGG | -CTTTGATGT |
| Eden_1         | CACCATGGCA | CCCTAACCTA | CGAAATTATC | GACAACTTTA | AAACATATGG | -CTTTGATGT |
| Valence_13     | CACCATGGCA | CCCTAACCTA | CGAAATTATC | GACAACTTTA | AAACATATGG | -CTTTGATGT |
| Eden_7         | CACCATGGCA | CCCTAACCTA | CGAAATTATC | GACAACTTTA | AAACATATGG | -CTTTGATGT |
| Valence_4      | CACCATGGCA | CCCTAACCTA | CGAAATTATC | GACAACTTTA | AAACATATGG | -CTTTGATGT |
| Valence_2      | CACCATGGCA | CCCTAACCTA | CGAAATTATC | GACAACTTTA | AAACATATGG | -CTTTGATGT |
| Valence_1      | CACCATGGCA | CCCTAACCTA | CGAAATTATC | GACAACTTTA | AAACATATGG | -CTTTGATGT |
| Valence_7      | CACCATGGCA | CCCTAACCTA | CGAAATTATC | GACAACTTTA | AAACATATGG | -CTTTGATGT |
| Makindu_cm1    | CACCATGGCA | CCCTAACCTA | CGAAATTATC | GACAACTTTA | AAACATATGG | -CTTTGATGT |
| Makindu_cm6    | CACCATGGCA | CCCTAACCTA | CGAAATTATC | GACAACTTTA | AAACATATGG | -CTTTGATGT |
| Makindu_1      | CACCATGGCA | CCCTAACCTA | CGAAATTATC | GACAACTTTA | AAACATATGG | -CTTTGATGT |
| Amieu_5        | CACCATAGCA | CCCTAAACTA | CGAAATTATC | GACAACTTTA | AAACATATGG | -CTTTGATGT |
| Eden_11        | CACCATAGCA | CCCTAACCTA | CGAAATTATC | GACAACTTTA | AAACATATGG | -CTTTGATGT |
| Cann-River_10  | CCCCAT---A | CC---A     | C-AAATTATC | GACAACTTGA | AAACATATGG | -CTTTGATGT |
| Brazzaville_10 | CCCCAT---A | CC---A     | C-AAATTATC | GACAACTTGA | AAACATATGG | -CTTTGATGT |
| Cann-River_3   | CACCATAGCA | CCCTAACCTA | CGAAATTATC | GACAACTTTA | AAACATATGG | -CTTTGATGT |
| Cann-River_13  | CACCATAGCA | CCCTAACCTA | CGAAATTATC | GACAACTTTA | AAACATATGG | -CTTTGATGT |
| Eden_4         | CACCATAGCA | CCCTAACCTA | CGAAATTATC | GACAACTTTA | AAACATATGG | -CTTTGATGT |
| Makindu_10     | CACCATAGCA | CCCTAACCTA | CGAAATTATC | GACAACTTTA | AAACATATGG | -CTTTGATGT |
| Makindu_11     | CACCATAGCA | CCCTAACCTA | CGAAATTATC | GACAACTTTA | AAACATATGG | -CTTTGATGT |
| Brazzaville_11 | CACCATGGCA | CCCTAACCTA | CGAAATTATC | AACAACTTTA | AAACATATGG | -CTTTGATGT |
| Brazzaville_12 | CACCATGGCA | CCCTAACCTA | CGAAATTATC | GACAACTTTA | AAACATATGG | -CTTTGATGT |
| Brazzaville_8  | CACCATGGCA | CCCTAACCTA | CGAAATTATC | GACAACTTTA | AAACATATGG | -CTTTGATGT |
| chrU_963982    | AACCATAGCA | CCCTAACCTA | CGAAATTATC | GACAACTTTA | AAA-----   | -----      |
| chr3L_18642496 | -----      | -----      | -----      | -----      | -----      | -----      |
| chrU_3975907   | -----      | -----      | -----      | -----      | -----      | -----      |
| chrU_10625041  | -----      | -----      | -----      | -----      | -----      | -----      |
| chrU_2316095   | -----      | -----      | -----      | -----      | -----      | -----      |
| chrU_4537377   | CACCATAGCA | CCGTAACCTA | CGAAATTATC | GACAACTTTA | AAACATATGG | -CTTTGATGT |
| chrU_5384045   | -----TAGCA | CCCTAACCTA | CGAAATTATC | GACAACTTTA | AAACATATGG | GCTTTGATAT |
| chrU_5680622   | -----      | -----      | -----      | -----      | -----      | -----      |
| chrU_5950518   | -----      | -----      | -----      | -----      | -----      | -----      |
| chrU_6132643   | -----      | -----      | -----      | -----      | -----      | -----      |
| chrU_16602314  | -----      | -----      | ---AATTATC | GACAACTTTA | AAACATATGG | -CTTTGATGT |
| chrU_6536133   | -----      | -----      | -----      | -----      | -----      | -----      |

|                |            |            |            |             |                  |            |
|----------------|------------|------------|------------|-------------|------------------|------------|
| chr3R_1506433  | T-CTACAAGT | ACACAACCCA | AGATCCAGGA | GAAATAGAGA  | AGAAAAACTT       | AATATATTCT |
| Brazzaville_16 | T-CTACAAGT | ACGTAACCCA | AGATCCAGGG | GAGATAGAGA  | AGAAAAACTT       | TATATATTCT |
| Eden_3         | T-CTACAAGT | ACATAACCCA | AGATCCAGGA | GAAATAGAGA  | AGAAAAACTT       | AATATATTCT |
| Cann-River_9   | T-CTACAAGT | ACATAACCCA | AGATCCAGGA | GAAATAGAGA  | AGAAAAACTT       | AATATATTCT |
| Amieu_2        | T-CTACAAGT | ACACAACCCA | AGATCCAGGA | GAAATAGAGA  | AGAAAAACTT       | AATATATTCT |
| Makindu_2      | T-CTACAAGT | ACATAACCCA | AGATCCAGGG | GAGATAGAGA  | AGAAAAACTT       | TATATATTCT |
| Makindu_6      | T-CTACAAGT | ACATAACCCA | AGATCCAGGG | GAGATAGAGA  | AGAAAAACTT       | TATATATTCT |
| Makindu_7      | T-CTACAAGT | ACATAACCCA | AGATCCAGGG | GAGATAGAGA  | AGAAAAACTT       | TATATATTCT |
| Valence_6      | T-CTACAAGT | ACATAACCCA | AGATCCAGGG | GAGATAGAGA  | AGAAAAACTT       | TATATATTCT |
| Makindu_8      | T-CTACAAGT | ACATAACCCA | AGATCCAGGG | GAGATAGAGA  | AGAAAAACTT       | TATATATTCT |
| Makindu_22     | T-CTACAAGT | ACATAACCCA | AGATCCAGGG | GAGATAGAGA  | AGAAAAACTT       | TATATATTCT |
| Canberra_5     | T-CTACAAGT | ACATAACCCA | AGATCCAGGG | GAGATAGAGA  | AGAAAAACTT       | TATATATTCT |
| Cann-River_2   | T-CTACAAGT | ACATAACCCA | AGATCCAGGG | GAGATAGAGA  | AGAAAGACTT       | TATATATTCT |
| Cann-River_6   | T-CTACAAGT | ACATAACCCA | AGATCCAGGG | GAGATAGAGA  | AGAAAAACTT       | TATATATTCT |
| Cann-River_7   | T-CTACAAGT | ACATAACCCA | AGATCCAGGG | GAGATAGAGA  | AGAAAAACTT       | TATATATTCT |
| Cann-River_5   | T-CTACAAGT | ACATAACCCA | AGATCCAGGG | GAGATAGAGA  | AGAAAAACTT       | TATATATTCT |
| Cann-River_8   | TTCTACAAGT | ACACAACCCA | AGATCCAGGA | GAAATAGAGA  | AGAAAAACTT       | AATATATTCT |
| Valence_5      | T-CTACAAGT | ACATAACCCA | AGATCCAGGG | GAGATAGAGA  | AGAAAAACTT       | TATATATTCT |
| Valence_9      | T-CTACAAGT | ACATAACCCA | AGATCCAGGG | GAGATAGAGA  | AGAAAAACTT       | TATATATTCT |
| Eden_1         | T-CTACAAGT | ACATAACCCA | AGATCCAGGG | GAGATAGAGA  | AGAAAAACTT       | TATATATTCT |
| Valence_13     | T-CTACAAGT | ACATAACCCA | AGATCCAGGG | GAGATAGAGA  | AGAAAAACTT       | TATATATTCT |
| Eden_7         | T-CTACAAGT | ACATAACCCA | AGATCCAGGG | GAGATAGAGA  | AGAAAAACTT       | TATATATTCT |
| Valence_4      | T-CTACAAGT | ACATAACCCA | AGATCCAGGG | GAGATAGAGA  | AGAAAAACTT       | TATATATTCT |
| Valence_2      | T-CTACAAGT | ACATAACCCA | AGATCCAGGG | GAGATAGAGA  | AGAAAAACTT       | TATATATTCT |
| Valence_1      | T-CTACAAGT | ACATAACCCA | AGATCCAGGG | GAGATAGAGA  | AGAAAAACTT       | TATATATTCT |
| Valence_7      | T-CTACAAGT | ACATAACCCA | AGATCCAGGG | GAGATAGAGA  | AGAAAAACTT       | TATATATTCT |
| Makindu_cm1    | T-CTACAAGT | ACATAACCCA | AGATCCAGGG | GAGATAGAGA  | AGAAAAACTT       | TATATATTCT |
| Makindu_cm6    | T-CTACAAGT | ACATAACCCA | AGATCCAGGG | GAGATAGAGA  | AGAAAAACTT       | TATATATTCT |
| Makindu_1      | T-CTACAAGT | ACATAACCCA | AGATCCAGGG | GAGATAGAGA  | AGAAAAACTT       | TATATATTCT |
| Amieu_5        | T-CTACAAGT | ACACAACCCA | AGATCCAGGA | GAAATAGAGA  | AGAAAAACTT       | AATATATTCT |
| Eden_11        | T-CTACAAGT | ACATAACCCA | AGATCCAGGA | GAAATAGAGA  | AGAAAAACTT       | AATATATTCT |
| Cann-River_10  | T-CTACAAGT | ACATAACCCA | AGATCCAGGA | CAAAATAGAGA | AGAAAAACTT       | AATATATTCT |
| Brazzaville_10 | T-CTACAAGT | ACATAACCCA | AGATCCAGGA | CAAAATAGAGA | AGAAAAACTT       | AATATATTCT |
| Cann-River_3   | T-CTACAAGT | ACACAACCCA | AGATCCAGGA | GAAATAGAGA  | AGAAAAACTT       | AATATATTCT |
| Cann-River_13  | T-CTACAAGT | ACATAACCCA | AGATCC-GGA | GAAATAGAGA  | AGAAAAACTT       | AATATATTCT |
| Eden_4         | T-CTACAAGT | ACATAACCCA | AGATCCAGGA | GAAATAGAGA  | AGAAAAACTT       | AATATATTCT |
| Makindu_10     | T-CTACAAGT | ACATAACCCA | AGATCCAGGA | GAAATAGAGA  | AGAAAAACTT       | AATATATTCT |
| Makindu_11     | T-CTACAAGT | ACATAACCCA | AGATCCAGGA | GAAATAGAGA  | AGAAAAACTT       | AATATATTCT |
| Brazzaville_11 | T-CTACAAGT | ACATAACCCA | AGATCCAGGG | GAGATAGAGA  | AGAAAAACTT       | TATATATTCT |
| Brazzaville_12 | T-CTACAAGT | ACATAACCCA | AGATCCAGGG | GAGATAGAGA  | AGAAAAACTT       | TATATATTCT |
| Brazzaville_8  | T-CTACAAGT | ACATAACCCA | AGATCCAGGG | GAGATAGAGA  | AGAAAAACTT       | TATATATTCT |
| chrU_963982    | -----      | -----      | -----      | -----       | -----            | -----      |
| chr3L_18642496 | -----      | -----      | -----      | -----       | -----            | -----      |
| chrU_3975907   | -----      | -----      | -----      | -----       | -----            | -----      |
| chrU_10625041  | -----      | -----      | -----      | -----       | -----            | -----      |
| chrU_2316095   | -----      | -----      | -----      | -----       | -----            | -----      |
| chrU_4537377   | T-CTACAAGT | ACACAACCCA | AGATCCAGGA | GAAATAGAGA  | AGAAAAACTT       | AATATATTCT |
| chrU_5384045   | T-CTACAAGT | ACATAACCCA | AGATCCAGGA | GAAATAGAGA  | AGAAAAACTT       | AATATATTCT |
| chrU_5680622   | -----      | -----      | -----      | -----       | -----            | -----      |
| chrU_5950518   | -----      | -----      | -----      | -----       | -----            | -----      |
| chrU_6132643   | -----      | -----      | -----      | -----       | -----            | -----      |
| chrX_16602314  | T-CTACAAGT | ACATAACCAA | AGATCCAGGA | GAAATAGACA  | AGAAAAACTT       | AATATATTCT |
| chrU_6536133   | -----      | -----      | -----      | -----AAACGT | -----AC-AIATTTCT | -----      |



|                |            |            |            |            |            |            |
|----------------|------------|------------|------------|------------|------------|------------|
| chr3R_1506433  | TCATTAATAT | AAAGACCTGT | GCAAAAATTA | ATGACATATA | CGATATTAAC | ACAATATGCC |
| Brazzaville_16 | TCATTAATAT | AAAGACCTGT | GCAAAAATTA | ATGACATATA | CGATATTAAC | ACAATATGCC |
| Eden_3         | TCATTAATAT | AAAGACCTGT | GCAAAAATTA | ATGACATATA | CGATATTAAC | ACAATATGCC |
| Cann-River_9   | TCATTAATAT | AAAGACCTGT | GCAAAAATTA | ATGACATATA | CGATATTAAC | ACAATATGCC |
| Amieu_2        | TCATTAATAT | AAAGACCTGT | GCAAAAATTA | ATGACATATA | CGATATTAAC | ACAATATGCC |
| Makindu_2      | TCATTAATAT | AAAGACCTGT | GCAAAAATTA | ATGACATATA | CGATATTAAC | ACAATATGCC |
| Makindu_6      | TCATTAATAT | AAAGACCTGT | GCAAAAATTA | ATGACATATA | CGATATTAAC | ACAATATGCC |
| Makindu_7      | TCATTAATAT | AAAGACCTGT | GCAAAAATTA | ATGACATATA | CGATATTAAC | ACAATATGCC |
| Valence_6      | TCATTAATAT | AAAGACCTGT | GCAAAAATTA | ATGACATATA | CGATATTAAC | ACAATATGCC |
| Makindu_8      | TCATTAATAT | AAAGACCTGT | GCAAAAATTA | ATGACATATA | CGATATTAAC | ACAATATGCC |
| Makindu_22     | TCATTAATAT | AAAGACCTGT | GCAAAAATTA | ATGACATATA | CGATATTAAC | ACAATATGCC |
| Canberra_5     | TCATTAATAT | AAAGACCTGT | GCAAAAATTA | ATGACATATA | CGATATTAAC | ACAATATGCC |
| Cann-River_2   | TCATTAATAT | AAAGACCTGT | GCAAAAATTA | ATGACATATA | CGATATTAAC | ACAATATGCC |
| Cann-River_6   | TCATTAATAT | AAAGACCTGT | GCAAAAATTA | ATGACATATA | CGATATTAAC | ACAATATGCC |
| Cann-River_7   | TCATTAATAT | AAAGACCTGT | GCAAAAATTA | ATGACATATA | CGATATTAAC | ACAATATGCC |
| Cann-River_5   | TCATTAATAT | AAAGACCTGT | GCAAAAATTA | ATGACATATA | CGATATTAAC | ACAATATGCC |
| Cann-River_8   | TCATTAATAT | AAAGACCTGT | GCAAAAATTA | ATGACATATA | CGATATTAAC | ACAATATGCC |
| Valence_5      | TCATTAATAT | AAAGACCTGT | GCAAAAATTA | ATGACATATA | CGATATTAAC | ACAATATGCC |
| Valence_9      | TCATTAATAT | AAAGACCTGT | GCAAAAATTA | ATGACATATA | CGATATTAAC | ACAATATGCC |
| Eden_1         | TCATTAATAT | AAAGACCTGT | GCAAAAATTA | ATGACATATA | CGATATTAAC | ACAATATGCC |
| Valence_13     | TCATTAATAT | AAAGACCTGT | GCAAAAATTA | ATGACATATA | CGATATTAAC | ACAATATGCC |
| Eden_7         | TCATTAATAT | AAAGACCTGT | GCAAAAATTA | ATGACATATA | CGATATTAAC | ACAATATGCC |
| Valence_4      | TCATTAATAT | AAAGACCTGT | GCAAAAATTA | ATGACATATA | CGATATTAAC | ACAATATGCC |
| Valence_2      | TCATTAATAT | AAAGACCTGT | GCAAAAATTA | ATGACATATA | CGATATTAAC | ACAATATGCC |
| Valence_1      | TCATTAATAT | AAAGACCTGT | GCAAAAATTA | ATGACATATA | CGATATTAAC | ACAATATGCC |
| Valence_7      | TCATTAATAT | AAAGACCTGT | GCAAAAATTA | ATGACATATA | CGATATTAAC | ACAATATGCC |
| Makindu_cm1    | TCATTAATAT | AAAGACCTGT | GCAAAAATTA | ATGACATATA | CGATATTAAC | ACAATATGCC |
| Makindu_cm6    | TCATTAATAT | AAAGACCTGT | GCAAAAATTA | ATGACATATA | CGATATTAAC | ACAATATGCC |
| Makindu_1      | TCATTAATAT | AAAGACCTGT | GCAAAAATTA | ATGACATATA | CGATATTAAC | ACAATATGCC |
| Amieu_5        | TCATTAATAT | AAAGACCTGT | GCAAAAATTA | ATGACATATA | CGATATTAAC | ACAATATGCC |
| Eden_11        | TCATTAATAT | AAAGACCTGT | GCAAAAATTA | ATGACATATA | CGATATTAAC | ACAATATGCC |
| Cann-River_10  | TCATTAATAT | AAAGACCTGT | GCAAAAATTA | ATGACATATA | CGATATTAAC | ACAATATGCC |
| Brazzaville_10 | TCATTAATAT | AAAGACCTGT | GCAAAAATTA | ATGACATATA | CGATATTAAC | ACAATATGCC |
| Cann-River_3   | TCATTAATAT | AAAGACCTGT | GCAAAAATTA | ATGACATATA | CGATATTAAC | ACAATATGCC |
| Cann-River_13  | TCATTAATAT | AAAGACCTGT | GCAAAAATTA | ATGACATATA | CGATATTAAC | ACAATATGCC |
| Eden_4         | TCATTAATAT | AAAGACCTGT | GCAAAAATTA | ATGACATATA | CGATATTAAC | ACAATATGCC |
| Makindu_10     | TCATTAATAT | AAAGACCTGT | GCAAAAATTA | ATGACATATA | CGATATTAAC | ACAATATGCC |
| Makindu_11     | TCATTAATAT | AAAGACCTGT | GCAAAAATTA | ATGACATATA | CGATATTAAC | ACAATATGCC |
| Brazzaville_11 | TCATTAATAT | AAAGACCTGT | GCAAAAATTA | ATGACATATA | CGATATTAAC | ACAATATGCC |
| Brazzaville_12 | TCATTAATAT | AAAGACCTGT | GCAAAAATTA | ATGACATATA | CGATATTAAC | ACAATATGCC |
| Brazzaville_8  | TCATTAATAT | AAAGACCTGT | GCAAAAATTA | ATGACATATA | CGATATTAAC | ACAATATGCC |
| chrU_963982    | -----      | -----      | -----      | -----      | -----      | -----      |
| chr3L_18642496 | -----      | -----      | -----      | -----      | -----      | -----      |
| chrU_3975907   | -----      | -----      | -----      | -----      | -----      | -----      |
| chrU_10625041  | -----      | -----      | -----      | -----      | -----      | -----      |
| chrU_2316095   | -----      | -----      | -----      | -----      | -----      | -----      |
| chrU_4537377   | TCATTAATAT | AAAGACCTGT | GCAAAAATTA | ATGACATATA | CGATATTAAC | ACAATATGCC |
| chrU_5384045   | TCATTAATAT | AAAGACCTGT | GCAAAAATTA | ATGACATATA | CGATATTAAC | ACAATATGCC |
| chrU_5680622   | -----      | -----      | -----      | -----      | -----      | -----      |
| chrU_5950518   | -----      | -----      | -----      | -----      | -----      | -----      |
| chrU_6132643   | -----      | -----      | -----      | -----      | -----      | -----      |
| chrX_16602314  | TCATTAATAT | AAAGACCTGT | GCAAAAATTA | ATGACATATA | CGATATTAAC | ACAATATGCC |
| chrU_6536133   | TCATTAATAT | AAAGACCTGT | GCAAAAATTA | ATGACATATA | CGATATTAAC | ACAATATGCC |

|                |            |            |             |            |            |            |
|----------------|------------|------------|-------------|------------|------------|------------|
| chr3R_1506433  | GACAGAAAGT | GCGGATAGAA | AGAATGCGTA  | AATCATCTGA | AATTGCACAA | TGCATACGTT |
| Brazzaville_16 | GACAGAAAGT | GCGGATAGAA | AGAATGCGTA  | AATCATCTAA | AATTGCTCAA | TGCATACGTT |
| Eden_3         | GACAGAAAGT | GCGGATAGAA | AGAATGCGTT  | AATCATCTGA | AATAGCTCAA | TGCATACGTT |
| Cann-River_9   | GACAGAAAGT | GCGGATAGAA | AGAATGCGTT  | AATCATCTGA | AATAGCTCAA | TGCATACGTT |
| Amieu_2        | GACAGAAAGT | GCGGATAGAA | AGAATGCGTA  | AATCATCTGA | AATTGCACAA | TGCATACGTT |
| Makindu_2      | GACAGAAAGT | GCGGATAGAA | AGAATGCGTA  | AATCATCTAA | AATTGCTCAA | TGCATACGTT |
| Makindu_6      | GACAGAAAGT | GCGGATAGAA | AGAATGCGTA  | AATCATCTAA | AATTGCTCAA | TGCATACGTT |
| Makindu_7      | GACAGAAAGT | GCGGATAGAA | AGAATGCGTA  | AATCATCTAA | AATTGCTCAA | TGCATACGTT |
| Valence_6      | GACAGAATGT | GCGGATAGAA | AGAATGCGTA  | AATCATCTAA | AATTGCTCAA | TGCATACGTT |
| Makindu_8      | GACAGAAAGT | GCGGATAGAA | AGAATGCGTA  | AATCATCTAA | AATTGCTCAA | TGCATACGTT |
| Makindu_22     | GACAGAAAGT | GCGGATAGAA | AGAATGCGTA  | AATCATCTAA | AATTGCTCAA | TGCATACGTT |
| Canberra_5     | GACAGAAAGT | GCGGATAGAA | AGAATGCGTA  | AATCATCTAA | AATTGCTCAA | TGCATACGTT |
| Cann-River_2   | GACAGAAAGT | GCGGATAGAA | AGAATGCGTA  | AATCATCTAA | AATTGCTCAA | TGCATACGTT |
| Cann-River_6   | GACAGAAAGT | GCGGATAGAA | AGAATGCGTA  | AATCATCTAA | AATTGCTCAA | TGCATACGTT |
| Cann-River_7   | GACAGAAAGT | GCGGATAGAA | AGAATGCGTA  | AATCATCTAA | AATTGCTCAA | TGCATACGTT |
| Cann-River_5   | GACAGAAAGT | GCGGATAGAA | AGAATGCGTA  | AATCATCTAA | AATTGCTCAA | TGCATACGTT |
| Cann-River_8   | GACAGAAAGT | GCGGATAGAA | AGAATGCGTA  | AGTCATCTAA | AATTGCTCAA | TGCATACGTT |
| Valence_5      | GACAGAATGT | GCGGATAGAA | AGAATGCGTA  | AATCATCTAA | AATTGCTCAA | TGCATACGTT |
| Valence_9      | GACAGAATGT | GCGGATAGAA | AGAATGCGTA  | AATCATCTAA | AATTGCTCAA | TGCATACGTT |
| Eden_1         | GACAGAAAGT | GCGGATAGAA | AGAATGCGTA  | AATCATCTAA | AATTGCTCTA | TGCATACGTT |
| Valence_13     | GACAGAATGT | GCGGATAGAA | AGAATGCGTA  | AATCATCTAA | AATTGCTCAA | TGCATACGTT |
| Eden_7         | GACAGAAAGT | GCGGATAGAA | AGAATGCGTA  | AATCATCTAA | AATTGCTCTA | TGCATACGTT |
| Valence_4      | GACAGAATGT | GCGGATAGAA | AGAATGCGTA  | AATCATCTAA | AATTGCTCAA | TGCATACGTT |
| Valence_2      | GACAGAATGT | GCGGATAGAA | AGAATGCGTA  | AATCATCTAA | AATTGCTCAA | TGCATACGTT |
| Valence_1      | GACAGAATGT | GCGGATAGAA | AGAATGCGTA  | AATCATCTAA | AATTGCTCAA | TGC-----   |
| Valence_7      | GACAGAATGT | GCGGATAGAA | AGAATGCGTA  | AATCATCTAA | AATTGCTCAA | TGCATACGTT |
| Makindu_cM1    | GACAGAATGT | GCGGATAGAA | AGAATGCGTA  | AATCATCTAA | AATTGCTCAA | TGCATACGTT |
| Makindu_cM6    | GACAGAATGT | GCGGATAGAA | AGAATGCGTA  | AATCATCTAA | AATTGCTCAA | TGCATACGTT |
| Makindu_1      | GACAGAAAGT | GCGGATAGAA | AGAATGCGTA  | AATCATCTAA | AATTGCTCAA | TGCATACGTT |
| Amieu_5        | GACAGAAAGT | GCGGATAGAA | AGAATGCGTA  | AATCATCTGA | AATTGCACAA | TGCATACGTT |
| Eden_11        | -----      | -----      | -----       | ---CATCTGA | AATTGCTCAA | TGCATACGTT |
| Cann-River_10  | GACAGAAAGT | ACGGATAGAA | AGAATGCATA  | AATCATCTGA | AATTTCTCAA | TGCATACGTT |
| Brazzaville_10 | GACAGAAAGT | ACGGATAGAA | AGAATGCATA  | AATCATCTGA | AATTTCTCAA | TGCATACGTT |
| Cann-River_3   | GACAGAAAGT | GCGGATAGAA | AGAATGCGTA  | AATCATCTGA | AATTGCTCAA | TGCATACGTT |
| Cann-River_13  | -----      | -----      | -----       | ---CATCTGA | AATTGCTCAA | TGCATACGTT |
| Eden_4         | -----      | -----      | -----       | ---CATCTGA | AATTGCTCAA | TGCATACGTT |
| Makindu_10     | -----      | -----      | -----       | ---CATCTGA | AATTGCTCAA | TGCATACGTT |
| Makindu_11     | -----      | -----      | -----       | ---CATCTGA | AATTGCTCAA | TGCATACGTT |
| Brazzaville_11 | GACAGAAAGT | GCGGATAGAA | AGAATGCGTA  | AATCATCTAA | AATTGCTCAA | TGCATACGTT |
| Brazzaville_12 | GACAGAAAGT | GCGGATAGAA | AGAATGCGTA  | AATCATCTAA | AATTGCTCAA | TGCATACGTT |
| Brazzaville_8  | GACAGAAAGT | GCGGATAGAA | AGAATGCGTA  | AATCATCTAA | AATTGCTCAA | TGCATACGTT |
| chrU_963982    | -----      | -----      | -----       | -----      | -----      | -----      |
| chr3L_18642496 | -----      | -----      | -----       | -----      | -----      | -----      |
| chrU_3975907   | -----      | -----      | -----       | -----      | -----      | -----      |
| chrU_10625041  | -----      | -----      | -----       | -----      | -----      | -----      |
| chrU_2316095   | -----      | -----      | -----       | -----      | -----      | -----      |
| chrU_4537377   | GACAGAAAGT | GCGGATAGAA | AGAATGCGTA  | AATCATCTGA | AATTGCACAA | TGCATACGTT |
| chrU_5384045   | GACAGAAAGT | GCGGATAGAA | AGAATGCGTT  | AATCATCTGA | AATAGCTCAA | TGCATACGTT |
| chrU_5680622   | -----      | -----      | -----       | -----      | -----      | -----      |
| chrU_5950518   | -----      | -----      | -----       | -----      | -----      | -----      |
| chrU_6132643   | -----      | -----      | -----       | -----      | -----      | -----      |
| chrX_16602314  | GACAGAAAGT | GCGGATAGAA | AGAATGCGTA  | AATCATCTGA | AATTGCTCAA | TGCATACGTT |
| chrU_6536133   | GACAGAAAAT | GCGGATGAA  | AAAAATGCGTA | AGTCTTCGGA | AATTGCTCAA | TGCATACGTT |

|                |            |            |            |             |            |            |
|----------------|------------|------------|------------|-------------|------------|------------|
| chr3R_1506433  | GTCAGGAATT | CGGCCACACA | GCCTCGATGT | GGTGAAAAATC | ACTTAACCAA | GCTATGCGTA |
| Brazzaville_16 | GTCAGGAATT | CGGCCACACA | GCCACGATGT | GGTGAAAAATC | ACTTAACCAA | GCTATGCGTA |
| Eden_3         | GTCAGGAATT | CGGCCACAAA | GCCTCGATGT | GGTGAAAAATC | ACTCAACCAA | GCTATGCGTA |
| Cann-River_9   | GTCAGGAATT | CGGCCACAAA | GCCTCGATGT | GGTGAAAAATC | ACTTAACCAA | GCTATGCGTA |
| Amieu_2        | GTCAGGAATT | CGGCCACACA | GCCTCGATGT | GGTGAAAAATC | ACTTAACCAA | GCTATGCGTA |
| Makindu_2      | GTCAGGAATT | CGGCCACACA | GCCACGATGT | GGTGAAAAATC | ACTTAACCAA | GCTATGCGTA |
| Makindu_6      | GTCAGGAATT | CGGCCACACA | GCCACGATGT | GGTGAAAAATC | ACTTAACCAA | GCTATGCGTA |
| Makindu_7      | GTCAGGAATT | CGGCCACACA | GCCACGGTGT | GGTGAAAAATC | ACTTAACCAA | GCTATGCGTA |
| Valence_6      | GTCAGGAATT | CGGCCACACA | GCCACGATGT | GGTGAAAAATC | ACTTAACCAA | GCTATGCGTA |
| Makindu_8      | GTCAGGAATT | CGGCCACACA | GCCACGATGT | GGTGAAAAATC | ACTTAACCAA | GCTATGCGTA |
| Makindu_22     | GTCAGGAATT | CGGCCACACA | GCCACGATGT | GGTGAAAAATC | ACTTAACCAA | GCTATGCGTA |
| Canberra_5     | GTCAGGAATT | CGGCCACACA | GCCACGATGT | GGTGAAAAATC | ACTTAACCAA | GCTATGCGTA |
| Cann-River_2   | GTCAGGAATT | CGGCCACACA | GCCACGATGT | GGTGAAAAATC | ACTTAACCAA | GCTATGCGTA |
| Cann-River_6   | GTCAGGAATT | CGGCCACACA | GCCACGATGT | GGTGAAAAATC | ACTTAACCAA | GCTATGCGTA |
| Cann-River_7   | GTCAGGAATT | CGGCCACACA | GCCACGATGT | GGTGAAAAATC | ACTTAACCAA | GCTATGCGTA |
| Cann_River_5   | GTCAGGAATT | CGGCCACACA | GCCACGATGT | GGTGAAAAATC | ACTTAACCAA | GCTATGCGTA |
| Cann-River_8   | GTCAGGAATT | CGGCCACACA | GCCACGATGT | GGTGAAAAATC | ACTTAACCAA | GCTATGCGTA |
| Valence_5      | GTCAGGAATT | CGGCCACACA | GCCACGATGT | GGTGAAAAATC | ACTTAACCAA | GCTATGCGTA |
| Valence_9      | GTCAGGAATT | CGGCCACACA | GCCACGATGT | GGTGAAAAATC | ACTTAACCAA | GCTATGCGTA |
| Eden_1         | GTCAGGAATT | CGGCCACACA | GCCACGATGT | GGTGAAAAATC | ACTTAACCCA | GCTATGCGTA |
| Valence_13     | GTCAGGAATT | CGGCCACACA | GCCACGATGT | GGTGAAAAATC | ACTTAACCAA | GCTATGCGTA |
| Eden_7         | GTCAGGAATT | CGGCCACACA | GCCACGATGT | GGTGAAAAATC | ACTTAACCAA | GCTATGCGTA |
| Valence_4      | GTCAGGAATT | CGGCCACACA | GCCACGATGT | GGTGAAAAATC | ACTTAACCAA | GCTATGCGTA |
| Valence_2      | GTCAGGAATT | CGGCCACACA | GCCACGATGT | GGTGAAAAATC | ACTTAACCAA | GCTATGCGTA |
| Valence_1      | -----      | -----      | -----      | -----       | -----      | -----      |
| Valence_7      | GTCAGGAATT | CGGCCACACA | GCCACGATGT | GGTGAAAAATC | ACTTAACC-- | -----      |
| Makindu_cM1    | GTCAGGAATT | CGGCCACACA | GCCACGATGT | GGTGAAAAATC | ACTTAACCAA | GCTATGCGTA |
| Makindu_cM6    | GTCAGGAATT | CGGCCACACA | GCCACGATGT | GGTGAAAAATC | ACTTAACCAA | GCTATGCGTA |
| Makindu_1      | GTCAGGAATT | CGGCCACACA | GCCACGATGT | GGTGAAAAATC | ACTTAACCAA | GCTATGCGTA |
| Amieu_5        | GTCAGGAATT | CGGCCACACA | GCCTCGATGT | GGTGAAAAATC | ACTTAACCAA | GCTATGCGTA |
| Eden_11        | GTCAGGAATT | CGGCCACACA | GCCTCGATGT | GGTGAAAAATC | ACTTAACCAA | GCTATGCGTA |
| Cann-River_10  | GTCAGGAATT | CGTCCACACA | GCCTCGATGT | GGTGAAAAATC | ACTTAACCAA | GCTATGCGTA |
| Brazzaville_10 | GTCAGGAATT | CGTCCACACA | GCCTCGATGT | GGTGAAAAATC | ACTTAACCCA | GCTATGCGTA |
| Cann-River_3   | GTCAGGAATT | CGGCCACACA | GCCTCGATGT | GGTGAAAAATC | ACTTAACCAA | GCTATGCGTA |
| Cann-River_13  | GTCAGGAATT | CGGCCACACA | GCCTCGATGT | GGTGAAAAATC | ACTTAACCAA | GCTATGCGTA |
| Eden_4         | GTCAGGAATT | CGGCCACACA | GCCTCGATGT | GGTGAAAAATC | ACTTAACCAA | GCTATGCGTA |
| Makindu_10     | GTCAGGAATT | CGGCCACACA | GCCTCGATGT | GGTGAAAAATC | ACTTAACCAA | GCTATGCGTA |
| Makindu_11     | GTCAGGAATT | CGGCCACACA | GCCTCGATGT | GGTGAAAAATC | ACTTAACCAA | GCTATGCGTA |
| Brazzaville_11 | GTCAGGAATT | CGGCCACACA | GCCACGATGT | GGTGAAAAATC | ACTTAACCAA | GCTATGCGTA |
| Brazzaville_12 | GTCAGGAATT | CGGCCACACA | GCCACGATGT | GGTGAAAAATC | ACTTAACCAA | GCTATGCGTA |
| Brazzaville_8  | GTCAGGAATT | CGGCCACACA | GCCACGATGT | GGTGAAAAATC | ACTTAACCAA | GCTATGCGTA |
| chrU_963982    | -----      | -----      | -----      | -----       | -----      | -----      |
| chr3L_18642496 | -----      | -----      | -----      | -----       | -----      | -----      |
| chrU_3975907   | -----      | -----      | -----      | ----AAATC   | ACTTAACCA- | GCTATGCGTA |
| chrU_10625041  | -----      | -----      | -----      | -----       | -----      | -----      |
| chrU_2316095   | -----      | -----      | --CTCGATGT | GGTGAAAAATC | ACTTAACCAA | GCTATGCGTA |
| chrU_4537377   | GTCAGGAATT | TGGCCACACA | GCCTCGATGT | GGTGAAAAATC | ACTTAACCAA | GCTATGCGTA |
| chrU_5384045   | GTCAGGAATT | CGGCCACAAA | GCCTCGATGT | GGTGAAAAATC | ACTTAACCAA | GCTATGCGTA |
| chrU_5680622   | -----      | -----      | -----      | -----       | -----      | -----      |
| chrU_5950518   | -----      | -----      | -----      | -----       | -----      | -----      |
| chrU_6132643   | -----      | -----      | -----      | -----       | -----      | -----      |
| chrX_16602314  | GTCAGGAATT | CGGCCACACA | GCCTCGATGT | GGTGAAAAATC | ACTTAACCAA | GCTATGCGTA |
| chrU_6536133   | GTCAGGAATT | CGGACATACA | GCCTCGTGT  | GGCGAAAAATC | ACTTAACCAA | GCTATGCGGG |

|                |            |            |            |            |            |             |
|----------------|------------|------------|------------|------------|------------|-------------|
| chr3R_1506433  | CTTCCCAATG | ATCAACAGCC | -----TAT   | CTGTATACAC | TGTGGAGGAA | ATCACACGGC  |
| Brazzaville_16 | CTTCCCAATG | ATCAACAGCC | -----TAT   | CTGTATACAC | TGTGGAGGAA | ATCACAAAGGC |
| Eden_3         | CTTCCCAATG | ATCAGCAGCC | -----TAT   | CTGTATACAC | TGTGGAGGAA | ATCACACGGC  |
| Cann-River_9   | CTTCCCAATG | ATCAACAGCC | -----TAT   | CTGTATACAC | TGTGGAGGAA | ATCACACGGC  |
| Amieu_2        | CTTCCCAATG | ATCAACAGCC | -----TAT   | CTGTATACAC | TGTGGAGGAA | ATCACACGGC  |
| Makindu_2      | CTTCCCAATG | ATCAACAGCC | -----TAT   | CTGTATACAC | TGTGGAGGAA | ATCACAAAGGC |
| Makindu_6      | CTTCCCAATG | ATCAACAGCC | -----TAT   | CTGTATACAC | TGTGGAGGAA | ATCACAAAGGC |
| Makindu_7      | CTTCCCAATG | ATCAACAGCC | -----TAT   | CTGTATACAC | TGTGGAGGAA | ATCACAAAGGC |
| Valence_6      | CTTCCCAATG | ATCAACAGCC | -----TAT   | CTGTATACAC | TGTGGAGGAA | ATCACAAAGGC |
| Makindu_8      | CTTCCCAATG | ATCAACAGCC | -----TAT   | CTGTATACAC | TGTGGAGGAA | ATCACAAAGGC |
| Makindu_22     | CTTCCCAATG | ATCAACAGCC | -----TAT   | CTGTATACAC | TGTGGAGGAA | ATCACAAAGGC |
| Canberra_5     | CTTCCCAATG | ATCAACAGCC | -----TAT   | CTGTATACAC | TGTGGAGGAA | ATCACAAAGGC |
| Cann-River_2   | CTTCCCAATG | ATCAACAGCC | -----TAT   | CTGTATACAC | TGTGGAGGAA | ATCACAAAGGC |
| Cann-River_6   | CTTCCCAATG | ATCAACAGCC | -----TAT   | CTGTATACAC | TGTGGAGGAA | ATCACAAAGGC |
| Cann-River_7   | CTTCCCAATG | ATCAACAGCC | -----TAT   | CTGTATACAC | TGTGGAGGAA | ATCACAAAGGC |
| Cann-River_5   | CTTCCCAATG | ATCAACAGCC | -----TAT   | CTGTATACAC | TGTGGAGGAA | ATCACAAAGGC |
| Cann-River_8   | CTTCCCAATG | ATCAACAGCC | -----TAT   | CTGTATACAC | TGTGGAGGAA | ATCACAAAGGC |
| Valence_5      | CTTCCCAATG | ATCAACAGCC | -----TAT   | CTGTATACAC | TGTGGAGGAA | ATCACAAAGGC |
| Valence_9      | CTTCCCAATG | ATCAACAGCC | -----TAT   | CTGTATACAC | TGTGGAGGAA | ATCACAAAGGC |
| Eden_1         | CTTCCCAATG | ATCAACAGCC | -----TAT   | CTGTATACAC | TGTGGAGGAA | ATCACAAAGGC |
| Valence_13     | CTTCCCAATG | ATCAACAGCC | -----TAT   | CTGTATACAC | TGTGGAGGAA | ATCACAAAGGC |
| Eden_7         | CTTCCCAATG | ATCAACAGCC | -----TAT   | CTGTATACAC | TGTGGAGGAA | ATCACAAAGGC |
| Valence_4      | CTTCCCAATG | ATCAACAGCC | -----TAT   | CTGTATACAC | TGTGGAGGAA | ATCACAAAGGC |
| Valence_2      | CTTCCCAATG | ATCAACAGCC | -----TAT   | CTGTATACAC | TGTGGAGGAA | ATCACAAAGGC |
| Valence_1      | -----      | -----      | -----      | -----      | -----      | -----       |
| Valence_7      | -----      | -----      | -----      | -----      | -----      | -----       |
| Makindu_cm1    | CTTCCCAATG | ATCAACAGCC | -----TAT   | CTGTATACAC | TGTGGAGGAA | ATCACAAAGGC |
| Makindu_cm6    | CTTCCCAATG | ATCAACAGCC | -----TAT   | CTGTATACAC | TGTGGAGGAA | ATCACAAAGGC |
| Makindu_1      | CTTCCCAATG | ATCAACAGCC | -----TAT   | CTGTATACAC | TGTGGAGGAA | ATCACAAAGGC |
| Amieu_5        | CTTCCCAATG | ATCAACAGCC | -----TAT   | CTGTATACAC | TGTGGAGGAA | ATCACACGGC  |
| Eden_11        | CTTCCCAATG | ATCAACAGCC | -----TAT   | CTGTATACAC | TGTGGAGGAA | ATCACACAGC  |
| Cann-River_10  | CTTCCCAATG | ATCAACAGCC | -----TAT   | CTGTATACAC | TGTGGAGGAA | ATCACACGGC  |
| Brazzaville_10 | CTTCCCAATG | ATCAACAGCC | -----TAT   | CTGTATACAC | TGTGGAGGAA | ATCACACGGC  |
| Cann-River_3   | CTTCCCAATG | ATCAACAGCC | -----TAT   | CTGTATACAC | TGTGGAGGAA | ATCACACGGC  |
| Cann-River_13  | CTTCCCAATG | ATCAACAGCC | -----TAT   | CTGTATACAC | TGTGGAGGAA | ATCACACAGC  |
| Eden_4         | CTTCCCAATG | ATCAACAGCC | -----TAT   | CTGTATACAC | TGTGGAGGAA | ATCACACAGC  |
| Makindu_10     | CTTCCCAATG | ATCAACAGCC | -----TAT   | CTGTATACAC | TGTGGAGGAA | ATCACACAGC  |
| Makindu_11     | CTTCCCAATG | ATCAACAGCC | -----TAT   | CTGTATACAC | TGTGGAGGAA | ATCACACAGC  |
| Brazzaville_11 | CTTCCCAATG | ATCAACAGCC | -----TAT   | CTGTATACAC | TGTGGAGGAA | ATCACAAAGGC |
| Brazzaville_12 | CTTCCCAATG | ATCAACAGCC | -----TAT   | CTGTATACAC | TGTGGAGGAA | ATCACAAAGGC |
| Brazzaville_8  | CTTCCCAATG | ATCAACAGCC | -----TAT   | CTGTATACAC | TGTGGAGGAA | ATCACAAAGGC |
| chrU_963982    | -----      | -----      | -----      | -----      | -----      | -----       |
| chr3L_18642496 | -----      | -----      | -----      | -----      | -----      | -----       |
| chrU_3975907   | CT-CCC-ATG | ATCA-CAGCC | -----TAT   | CTGTATACAC | TGTGGAGGAA | -TCACACGGC  |
| chrU_10625041  | -----      | -----      | -----      | -----      | -----      | --CACACTGC  |
| chrU_2316095   | CTTCCCAATG | ATCAACAGCC | -----TAT   | CTGTATACAC | TGTGGAGGAA | ATCACACGGC  |
| chrU_4537377   | CTTCCCAATG | ATCAACAGCC | -----TAT   | CTGTATACAC | TGTGGAGGAA | ATCACACGGC  |
| chrU_5384045   | CTTCCCAATG | ATCAACAGCC | -----TAT   | CTGTATACAC | TGTGGAGGAA | ATCACACGGC  |
| chrU_5680622   | -----      | -----      | -----      | -----      | -----      | -----       |
| chrU_5950518   | -----      | -----      | -----      | -----      | -----      | -----       |
| chrU_6132643   | -----      | -----      | -----      | -----      | -----      | -----       |
| chrX_16602314  | CTTCCCAATG | ATCAACAGCC | -----TAT   | CTGTATACAC | TGTGGAGGAA | ATCACACGGC  |
| chrU_6536133   | CTTCCCAATG | ATCA---GCC | AACAGCCTAT | CAGT-----  | ---GGAGGAA | ATCATTCCGC  |

|                |            |            |            |             |            |            |
|----------------|------------|------------|------------|-------------|------------|------------|
| chr3R_1506433  | AAGTTACAAG | GGTTGCCAGT | TTTACCAGGA | GTATCTTCGA  | CGATCAATGG | GCACTGTAAA |
| Brazzaville_16 | AAGCTACAAA | GGTTGCCAGT | TTTACCAGGA | GTATCTTCGA  | CGATCAATGG | GCACTGTAAA |
| Eden_3         | AAGCTACAAG | GGTTGCCAGT | TTTACCAGGA | GTATCTTCGA  | CGATCACTG- | --ACTGTAAA |
| Cann-River_9   | AAGCTACAAA | GGTTGCCAGT | TTTACCAGGA | GTATCTTCGA  | CGATCACTG- | --ACTGTAAA |
| Amieu_2        | AAGTTACAAG | GGTTGCCAGT | TTTACCAGGA | GTATCTTCGA  | CGATCAATGG | GCACTGTAAA |
| Makindu_2      | AAGCTACAAA | GGTTGCCAGT | TTTACCAGGA | GTATCTTCGA  | CGATCAATGG | GCACTGTAAA |
| Makindu_6      | AAGCTACAAA | GGTTGCCAGT | TTTACCAGGA | GTATCTTCGA  | CGATCAATGG | GCACTGTAAA |
| Makindu_7      | AAGCTACAAA | GGTTGCCAGT | TTTACCAGGA | GTATCTTCGA  | CGATCAATGG | GCACTGTAAA |
| Valence_6      | AAGCTACAAA | GGTTGCCAGT | TTTACCAGGA | GTATCTTCGA  | CGATCAATGG | GCACTGTAAA |
| Makindu_8      | AAGCTACAAA | GGTTGCCAGT | TTTACCAGGA | GTATCTTCGA  | CGATCAATGG | GCACTGTAAA |
| Makindu_22     | AAGCTACAAA | GGTTGCCAGT | TTTACCAGGA | GTATCTTCGA  | CGATCAATGG | GCACTGTAAA |
| Canberra_5     | AAGCTACAAA | GGTTGCCAGT | TTTACCAGGA | GTATCTTCGA  | CGATCAATGG | GCACTGTAAA |
| Cann-River_2   | AAGCTACAAA | GGTTGCCAGT | TTTACCAGGA | GTATCTTCGA  | CGATCAATGG | GCACTGTAAA |
| Cann-River_6   | AAGCTACAAA | GGTTGCCAGT | TTTACCAGGA | GTATCTTCGA  | CGATCAATGG | GCACTGTAAA |
| Cann-River_7   | AAGCTACAAA | GGTTGCCAGT | TTTACCAGGA | GTATCTTCGA  | CGATCAATGG | GCACTGTAAA |
| Cann-River_5   | AAGCTACAAA | GGTTGCCAGT | TTTACCAGGA | GTATCTTCGA  | CGATCAATGG | GCACTGTAAA |
| Cann-River_8   | AAGCTACAAA | GGTTGCCAGT | TTTACCAGGA | GTATCTTCGA  | CGATCAATGG | GCACTGTAAA |
| Valence_5      | AAGCTACAAA | GGTTGCCAGT | TTTACCAGGA | GTATCTTCGA  | CGATCAATGG | GCACTGTAAA |
| Valence_9      | AAGCTACAAA | GGTTGCCAGT | TTTACCAGGA | GTATCTTCGA  | CGATCAATGG | GCACTGTAAA |
| Eden_1         | AAGCTACAAA | GGTTGCCAGT | TTTACCAGGA | GTATCTTCGA  | CGATCAATGG | GCACTGTAAA |
| Valence_13     | AAGCTACAAA | GGTTGCCAGT | TTTACCAGGA | GTATCTTCGA  | CGATCAATGG | GCACTGTAAA |
| Eden_7         | AAGCTACAAA | GGTTGCCAGT | TTTACCAGGA | GTATCTTCGA  | CGATCAATGG | GCACTGTAAA |
| Valence_4      | AAGCTACAAA | GGTTGCCAGT | TTTACCAGGA | GTATCTTCGA  | CGATCAATGG | GCACTGTAAA |
| Valence_2      | AAGCTACAAA | GGTTGCCAGT | TTTACCAGGA | GTATCTTCGA  | CGATCAATGG | GCACTGTAAA |
| Valence_1      | -----      | -----      | -----      | -----       | -----      | -----      |
| Valence_7      | -----      | -----      | -----      | -----       | -----      | -----      |
| Makindu_cm1    | AAGCTACAAA | GGTTGCCAGT | TTTACCAGGA | GTATCTTCGA  | CGATCAATGG | GCACTGTAAA |
| Makindu_cm6    | AAGCTACAAA | GGTTGCCAGT | TTTACCAGGA | GTATCTTCGA  | CGATCAATGG | GCACTGTAAA |
| Makindu_1      | AAGCTACAAA | GGTTGCCAGT | TTTACCAGGA | GTATCTTCGA  | CGATCAATGG | GCACTGTAAA |
| Amieu_5        | AAGTTACAAG | GGTTGCCAGT | TTTACCAGGA | GTATCTTCGA  | CGATCAATGG | GCACTGTAAA |
| Eden_11        | AAGTTACAAG | GGTTGCCAGT | TTTACCAGGA | GTATCTTCGA  | CGATCAATGG | GCACTGTAAA |
| Cann-River_10  | AAGTTACAAG | GGTTGCCAGT | TTTACCAGGA | GTATCTTCGA  | CGATCAATGG | GCACTGTAAA |
| Brazzaville_10 | AAGTTACAAG | GGTTGCCAGT | TTTACCAGGA | GTATCTTCGA  | CGATCAATGG | GCACTGTAAA |
| Cann-River_3   | AAGTTACAAG | GGTTGCCAGT | TTTACCAGGA | GTATCTTCGA  | CGATCAATGG | GCACTGTAAA |
| Cann-River_13  | AAGTTACAAG | GGTTGCCAGT | TTTACCAGGA | GTATCTTCGA  | CGATCAATGG | GCACTGTAAA |
| Eden_4         | AAGTTACAAG | GGTTGCCAGT | TTTACCAGGA | GTATCTTCGA  | CGATCAATGG | GCACTGTAAA |
| Makindu_10     | AAGTTACAAG | GGTTGCCAGT | TTTACCAGGA | GTATCTTCGA  | CGATCAATGG | GCACTGTAAA |
| Makindu_11     | AAGTTACAAG | GGTTGCCAGT | TTTACCAGGA | GTATCTTCGA  | CGATCAATGG | GCACTGTAAA |
| Brazzaville_11 | AAGCTACAAA | GGTTGCCAGT | TTTACCAGGA | GTATCTTCGA  | CGATCAATGG | GCACTGTAAA |
| Brazzaville_12 | AAGCTACAAA | GGTTGCCAGT | TTTACCAGGA | GTATCTTCGA  | CGATCAATGG | GCACTGTAAA |
| Brazzaville_8  | AAGCTACAAA | GGTTGCCAGT | TTTACCAGGA | GTATCTTCGA  | CGATCAATGG | GCACTGTAAA |
| chrU_963982    | -----      | -----      | -----      | -----       | -----      | -----      |
| chr3L_18642496 | -----      | -----      | -----      | -----       | -----      | -----      |
| chrU_3975907   | AAGTTACAAG | GGTTGCCAGT | TTTACCAGGA | GTATCTTCGA  | CGATCAATGG | GCACTGTAAA |
| chrU_10625041  | AAGTTACAAG | GGTTGCCAGT | TTTACCAGGA | GTATCTTCGA  | CGATCAATGG | GCACTGTAAA |
| chrU_2316095   | AAGTTACAAG | GGTTGCCAGT | TTTACCAGGA | GTATCTTCGA  | CGATCAATGG | GCACTGTAAA |
| chrU_4537377   | AAGTTACAAG | GGTTGCCAGT | TTTACCAGGA | GTATCTTCGA  | CGATCAATGG | GCACTGTAAA |
| chrU_5384045   | AAGCTACAAA | GGTTGCCAGT | TTTACCAGGA | GTATCTTCGA  | CGATCACTG- | --ACTGTAAA |
| chrU_5680622   | -----      | -----      | -----      | -----       | -----      | -----      |
| chrU_5950518   | -----      | -----      | -----CAGGA | GTATCTTCGA  | CGATCAATAA | GCACTGTAAA |
| chrU_6132643   | -----      | -----      | -----      | -----       | -----      | -----      |
| chrX_16602314  | AAGCTACAAA | GGTTGCCAGT | TTTACCAGGA | GTATCTTCGA  | CGATCAATGG | GCACTGTAAA |
| chrU_6536133   | AAGTTACAAG | CG-----    | -----      | -----CTTACA | -----AATGG | GCACTATAAG |

|                |            |            |            |            |            |            |
|----------------|------------|------------|------------|------------|------------|------------|
| chr3R_1506433  | GAAGCAACAA | CCTAAGCAAG | CCAAGTTTGA | TAAAAGTGCA | ACAAACCAAC | AACAACCCCA |
| Brazzaville_16 | GAAGCAACAA | CCTAAGCAAG | CCAGGTTAGA | TAAAAGTGCA | ACCAACCAGC | AACAACCCCA |
| Eden_3         | GAAGCAACAA | CCTAAGCAAG | CCAGGTTAGA | TAAAAGTGCA | ACCAACCAGC | AACAACCCCA |
| Cann-River_9   | GAAGCAACAA | CCTAAGCAAG | CCAGGTTAGA | TAAAAGTGCA | ACCAACCAGC | AACAACCCCA |
| Amieu_2        | GAAGCAACAA | CCTAAGCAAG | CCAAGTTTGA | TAAAAGTGCA | ACAAACCAAC | AACAACCCCA |
| Makindu_2      | GAAGCAACAA | CCTAAGCAAG | CCAGGTTAGA | TAAAAGTGCA | ACCAACCAGC | AACAACCCCA |
| Makindu_6      | GAAGCAACAA | CCTAAGCAAG | CCAGGTTAGA | TAAAAGTGCA | ACCAACCAGC | AACAACCCCA |
| Makindu_7      | GAAGCAACAA | CCTAAGCAAG | CCAGGTTAGA | TAAAAGTGCA | ACCAACCAGC | AACAACCCCA |
| Valence_6      | GAAGCAACAA | CCTAAGCAAG | CCAGGTTAGA | TAAAAGTGCA | ACCAACCAGC | AACAACCCCA |
| Makindu_8      | GAAGCAACAA | CCTAAGCAAG | CCAGGTTAGA | TAAAAGTGCA | ACCAACCAGC | AACAACCCCG |
| Makindu_22     | GAAGCAACAA | CCTAAGCAAG | CCAGGTTAGA | TAAAAGTGCA | ACCAACCAGC | AACAACCCCA |
| Canberra_5     | GAAGCAACAA | CCTAAGCAAG | CCAGGTTAGA | TAAAAGTGCA | ACCAACCAGC | AACAACCCCA |
| Cann-River_2   | GAAGCAACAA | CCTAAGCAAG | CCAGGTTAGA | TAAAAGTGCA | ACCAACCAGC | AACAACCCCA |
| Cann-River_6   | GAAGCAACAA | CCTAAGCAAG | CCAGGTTAGA | TAAAAGTGCA | ACCAACCAGC | AACAACCCCA |
| Cann-River_7   | GAAGCAACAA | CCTAAGCAAG | CCAGGTTAGA | TAAAAGTGCA | ACCAACCAGC | AACAACCCCA |
| Cann-River_5   | GAAGCAACAA | CCTAAGCAAG | CCAGGTTAGA | TAAAAGTGCA | ACCAACCAGC | AACAACCCCA |
| Cann-River_8   | GAAGCAACAA | CCTAAGCAAG | CCAGGTTAGA | TAAAAGTGCA | ACCAACCAGC | AACAACCCCA |
| Valence_5      | GAAGCAACAA | CCTAAGCAAG | CCAGGTTAGA | TAAAAGTGCA | ACCAACCAGC | AACAACCCCA |
| Valence_9      | GAAGCAACAA | CCTAAGCAAG | CCAGGTTAGA | TAAAAGTGCA | ACCAACCAGC | AACAACCCCA |
| Eden_1         | GAAGCAACAA | CCTAAGCAAG | CCAGGTTAGA | TAAAAGTGCA | ACCAACCAGC | AACAACCCCA |
| Valence_13     | GAAGCAACAA | CCTAAGCAAG | CCAGGTTAGA | TAAAAGTGCA | ACCAACCAGC | AACAACCCCA |
| Eden_7         | GAAGCAACAA | CCTAAGCAAG | CCAGGTTAGA | TAAAAGTGCA | ACCAACCAGC | AACAACCCCA |
| Valence_4      | GAAGCAACAA | CCTAAGCAAG | CCAGGTTAGA | TAAAAGTGCA | ACCAACCAGC | AACAACCCCA |
| Valence_2      | GAAGCAACAA | CCTAAGCAAG | CCAGGTTAGA | TAAAAGTGCA | ACCAACCAGC | AACAACCCCA |
| Valence_1      | -----      | -----      | -----      | -----      | -----      | -----      |
| Valence_7      | -----      | -----      | -----      | -----      | -----      | -----      |
| Makindu_cm1    | GAAGCAACAA | CCTAAGCAAG | CCAGGTTAGA | TAAAAGTGCA | ACCAACCAGC | AACAACCCCA |
| Makindu_cm6    | GAAGCAACAA | CCTAAGCAAG | CCAGGTTAGA | TAAAAGTGCA | ACCAACCAGC | AACAACCCCA |
| Makindu_1      | GAAGCAACAA | CCTAAGCAAG | CCAGGTTAGA | TAAAAGTGCA | ACCAACCAGC | AACAACCCCA |
| Amieu_5        | GAAGCAACAA | CCTAAGCAAG | CCAAGTTTGA | TAAAAGTGCA | ACAAACCAAC | AACAACCCCA |
| Eden_11        | GAAGCAACAA | CCTAAGCAAG | ACAGGTTAGA | TAAAAGTGCA | ACAAACCAGC | AACAACCCCA |
| Cann-River_10  | GAAGCAACAA | CCTAAGCAAG | CCAGGTTAGA | TAAAAGTGCA | ACAAACCAGC | AACAACCCCA |
| Brazzaville_10 | GAAGCAACAA | CCTAAGCAAG | CCAGGTTAGA | TAAAAGTGCA | ACAAACCAGC | AACAACCCCA |
| Cann-River_3   | GAAGCAACAA | CCTAAGCAAG | CCAGGTTTGA | TAAAAGTGCA | ACAAATCAAC | AACAACCCCA |
| Cann-River_13  | GAAGCAACAA | CCTAAGCAAG | ACAGGTTAGA | TAAAAGTGCA | ACAAACCAGC | AACAACCCCA |
| Eden_4         | GAAGCAACAA | CCTAAGCAAG | ACAGGTTAGA | TAAAAGTGCA | ACAAACCAGC | AACAACCCCA |
| Makindu_10     | GAAGCAACAA | CCTAAGCAAG | ACAGGTTAGA | TAAAAGTGCA | ACAAACCAGC | AACAACCCCA |
| Makindu_11     | GAAGCAACAA | CCTAAGCAAG | ACAGGTTAGA | TAAAAGTGCA | ACAAACCAGC | AACAACCCCA |
| Brazzaville_11 | GAAGCAACAA | CCTAAGCAAG | CCAGGTTAGA | TAAAAGTGCA | ACCAACCAGC | AACAACCCCA |
| Brazzaville_12 | GAAGCAACAA | CCTAAGCAAG | CCAGGTTAGA | TAAAAGTGCA | ACCAACCAGC | AACAACCCCA |
| Brazzaville_8  | GAAGCAACAA | CCTAAGCAAG | CCAGGTTAGA | TAAAAGTGCA | ACCAACCAGC | AACAACCCCA |
| chrU_963982    | -----      | -----      | -----      | -----      | -----      | -----      |
| chr3L_18642496 | -----      | -----      | -----      | -----      | -----      | -----      |
| chrU_3975907   | GAAGCAACAA | CCTAAGCAAG | CCAGGTTAGA | TAAAAGTGCA | ACAAACCAGC | AACAACCCCA |
| chrU_10625041  | GAAGCAACAA | CCTAAGCAAG | CCAGGTTAGA | TAAAAGTGCA | ACAAACCAGC | AACAACCCCA |
| chrU_2316095   | GAAGCAACAA | CCTAAGCAAG | CCAGGTTAGA | TAAAAGTGCA | ACAAACCAGC | AACAACCCCA |
| chrU_4537377   | GAAGCAACAA | CCTAAGCAAG | CCAGGTTTGA | TAAAAGTGCA | ACAAACCAAC | AACAACCCCA |
| chrU_5384045   | GAAGCAACAA | CCTAAGCAAG | CCAGGTTAGA | TAAAAGTGCA | ACCAACCAGC | AACAACCCCA |
| chrU_5680622   | -----      | -----      | -----      | -----      | -----      | -----      |
| chrU_5950518   | GAAGCAACAA | CCTAAGCAAG | CCAGGTTAGA | TA-----    | -----G     | CAACACCCCA |
| chrU_6132643   | -----      | -----      | -----      | -----      | -----      | -----      |
| chrX_16602314  | GAAGCTACAA | CCTAAGCAAG | CCAGGTTAGA | TAAAAGTGCA | ACCAACCAGC | AACAACCCCA |
| chrU_6536133   | GAAGCAACAA | CCTAAGCAAG | ACAGTTTAGA | TAAAAGTGCA | ACAAACCAAT | AAGAACCCCA |

|                |             |            |            |            |            |            |
|----------------|-------------|------------|------------|------------|------------|------------|
| chr3R_1506433  | GCAAAAAACAG | CAGCATGCAA | TAGCTAGCAC | TCCCAAAGAT | CATACTGGGA | GCTTGTCCTA |
| Brazzaville_16 | GCAAAAAACAG | CAGCATACAA | TAGCTAGCAC | TCCCAAAGGT | CATACTGGGA | GCTTGTCCTA |
| Eden_3         | GCAAAAAACAG | CAGCATACAA | TAGAAGGCAC | TCCCAAAGAT | CATATGGGA  | GCTTGTCCTA |
| Cann-River_9   | GCGAAAAACAG | CAGCATACAA | TAGAAGGCAC | TCCCAAAGAT | CATATGGGA  | GCTTGTCCTA |
| Amieu_2        | GCAAAAAACAG | CAGCATGCAA | TAGCTAGC-- | -----      | -----      | -----      |
| Makindu_2      | GCAAAAAACAG | CAGCATACAA | TAGCTAGCAC | TCCCAAAGGT | CATACTGGGA | GCTTGTCCTA |
| Makindu_6      | GCAAAAAACAG | CAGCATACAA | TAGCTAGCAC | TCCCAAAGGT | CATACTGGGA | GCTTGTCCTA |
| Makindu_7      | GCAAAAAACAG | CAGCATACAA | TAGCTAGCAC | TCCCAAAGGT | CATACTGGGA | GCTTGTCCTA |
| Valence_6      | GCAAAAAACAG | CAGCATACAA | TAGCTAGCAC | TCCCAAAGGT | CATACTGGGA | GCTTGTCCTA |
| Makindu_8      | GCAAAAAACAG | CAGCATACAA | TAGCTAGCAC | TCCCAAAGGT | CATACTGGGA | GCTTGTCCTA |
| Makindu_22     | GCAAAAAACAG | CAGCATACAA | TAGCTAGCAC | TCCCAAAGGT | CATACTGGGA | GCTTGTCCTA |
| Canberra_5     | GCAAAAAACAG | CAGCATACAA | TAGCTAGCAC | TCCCAAAGGT | CATACTGGGA | GCTTGTCCTA |
| Cann-River_2   | GCAAAAAACAG | CAGCATACAA | TAGCTAGCAC | TCCCAAAGGT | CATACTGGGA | GCTTGTCCTA |
| Cann-River_6   | GCAAAAAACAG | CAGCATACAA | TAGCTAGCAC | TCCCAAAGGT | CATACTGGGA | GCTTGTCCTA |
| Cann-River_7   | GCAAAAAACAG | CAGCATACAA | TAGCTAGCAC | TCCCAAAGGT | CATACTGGGA | GCTTGTCCTA |
| Cann_River_5   | GCAAAAAACAG | CAGCATACAA | TAGCTAGCAC | TCCCAAAGGT | CATACTGGGA | GCTTGTCCTA |
| Cann-River_8   | GCAAAAAACAG | CAGCATACAA | TAGCTAGCAC | TCCCAAAGGT | CATACTGGGA | GCTTGTCCTA |
| Valence_5      | GCAAAAAACAG | CAGCATACAA | TAGCTAGCAC | TCCCAAAGGT | CATACTGGGA | GCTTGTCCTA |
| Valence_9      | GCAAAAAACAG | CAGCATACAA | TAGCTAGCAC | TCCCAAAGGT | CATACTGGGA | GCTTGTCCTA |
| Eden_1         | GCAAAAAACAG | CAGCATACAA | TAGCTAGCAC | TCCCAAAGGT | CATACTGGGA | GCTTGTCCTA |
| Valence_13     | GCAAAAAACAG | CAGCATACAA | TAGCTAGCAC | TCCCAAAGGT | CATACTGGGA | GCTTGTCCTA |
| Eden_7         | GCAAAAAACAG | CAGCATACAA | TAGCTAGCAC | TCCCAAAGGT | CATACTGGGA | GCTTGTCCTA |
| Valence_4      | GCAAAAAACAG | CAGCATACAA | TAGCTAGCAC | TCCCAAAGGT | CATACTGGGA | GCTTGTCCTA |
| Valence_2      | GCAAAAAACAG | CAGCATACAA | TAGCTAGCAC | TCCCAAAGGT | CATACTGGGA | GCTTGTCCTA |
| Valence_1      | -----       | -----      | -----      | -----      | -----      | -----      |
| Valence_7      | -----       | -----      | -----      | -----      | -----      | -----      |
| Makindu_cm1    | GCAAAAAACAG | CAGCATACAA | TAGCTAGCAC | TCCCAAAGGT | CATACTGGGA | GCTTGTCCTA |
| Makindu_cm6    | GCAAAAAACAG | CAGCATACAA | TAGCTAGCAC | TCCCAAAGGT | CATACTGGGA | GCTTGTCCTA |
| Makindu_1      | GCAAAAAACAG | CAGCATACAA | TAGCTAGCAC | TCCCAAAGGT | CATACTGGGA | GCTTGTCCTA |
| Amieu_5        | GCAAAAAACAG | CAGCATGCAA | TAGCTAGCAC | TCCCAAAGAT | CATACTGGGA | GCTTGTCCTA |
| Eden_11        | GCAAAAAACAG | CAGCATGCAA | TAGCTAGCAC | TCCCAAAGAT | AATACTGGGA | GCTTGTCCTA |
| Cann-River_10  | GCAAAAAACAG | CAGCATGCAA | TAGCTAGCAC | TCCCAAAGAT | CATACTGGGA | GCTTGTGCTA |
| Brazzaville_10 | GCAAAAAACAG | CAGCATGCAA | TAGCTAGCAC | TCCCAAAGAT | CATACTGGGA | GCTTGTGCTA |
| Cann-River_3   | GCAAAAAACAG | CAGCATGCAA | TAGCTAGCAC | TCCCAAAGAT | CATACTGGGT | GCTTGTCCTA |
| Cann-River_13  | GCAAAAAACAG | CAGCATGCAA | TAGCTAGCAC | TCCCAAAGAT | AATACTGGGA | GCTTGTCCTA |
| Eden_4         | GCAAAAAACAG | CAGCATGCAA | TAGCTAGCAC | TCCCAAAGAT | AATACTGGGA | GCTTGTCCTA |
| Makindu_10     | GCAAAAAACAG | CAGCATGCAA | TAGCTAGCAC | TCCCAAAGAT | AATACTGGGA | GCTTGTCCTA |
| Makindu_11     | GCAAAAAACAG | CAGCATGCAA | TAGCTAGCAC | TCCCAAAGAT | AATACTGGGA | GCTTGTCCTA |
| Brazzaville_11 | GCAAAAAACAG | CAGCATACAA | TAGCTAGCAC | TCCCAAAGGT | CATACTGGGA | GCTTGTCCTA |
| Brazzaville_12 | GCAAAAAACAG | CAGCATACAA | TAGCTAGCAC | TCCCAAAGGT | CATACTGGGA | GCTTGTCCTA |
| Brazzaville_8  | GCAAAAAACAG | CAGCATACAA | TAGCTAGCAC | TCCCAAAGGT | CATACTGGGA | GCTTGTCCTA |
| chrU_963982    | -----       | -----      | -----      | -----      | -----      | -----      |
| chr3L_18642496 | -----       | -----      | -----      | -----      | -----      | -----      |
| chrU_3975907   | GCAAAAAACAG | CAGCATGCAA | TAGCTAGCAC | TCCCAAAGAT | CATACTGGGA | GCTTGTGCTA |
| chrU_10625041  | GCAAAAAACAG | TAGCATGCAA | TAGCTAGCAC | TCCCAA--T  | CATACTGGAT | GCATGTCCTA |
| chrU_2316095   | GCAAAAAACAG | CAGCATGCAA | TAGCTAGCAC | TCCCAAAGAT | CATACTGGGA | GCTTGTGCTA |
| chrU_4537377   | GCAAAAAACAG | CAGCATGCAA | TAGCTAGCAC | TCCCAAAGAT | CATACTGGGA | GCTTGTCCTA |
| chrU_5384045   | GCAAAAAACAG | CAGCATACAA | TAGAAGGCAC | TCCCAAAGAT | CATATGGGA  | GCTTGTCCTA |
| chrU_5680622   | -----       | -----      | -----      | -----      | -----      | -----      |
| chrU_5950518   | GCAAAAAACAG | CAGCATGCAA | TAGCTAGCAC | TCCCAAAGAT | CATACTGGAT | GCTTGTCCTA |
| chrU_6132643   | -----       | -----      | -----      | -----      | -----      | -----      |
| chrX_16602314  | GCAAAAAACAG | CAGCATACAA | TAGCTAGCAC | TCCCAAAGAT | CATACTGGGA | GCTTGTCCTA |
| chrU_6536133   | GCAAAAAACAG | CAGCATGCAA | TAGCTAGCAC | TCCCAAAGCC | CATAGTTGTA | CCTTGTCCTA |

|                |            |             |            |            |            |            |
|----------------|------------|-------------|------------|------------|------------|------------|
| chr3R_1506433  | CGCAGATATT | GCAAGAAATG  | GCAATACAAC | AGCCCAGCCT | CGTCTACATA | ATGTACAATT |
| Brazzaville_16 | CGCAGATATT | GCAAGAAATG  | GCAATACAAC | AGCCCAGCCT | CGTCTACATA | ATGTACAATT |
| Eden_3         | CGCAGATATT | GCAAGAAATG  | GCAATACAAC | AGCCCAGCCT | CGTCTACATA | ATGTACAATT |
| Cann-River_9   | CGCAGATGTT | GCAAGAAATG  | GCAATACAAC | AGCCCAGCCT | CGTCTACATA | ATGTACAATT |
| Amieu_2        | -----      | -----       | -----      | -----      | -----      | -----      |
| Makindu_2      | CGCAGATATT | GCAAGAAATG  | GCAATACAAC | AGCCCAGCCT | CGTCTACATA | ATGTACAATT |
| Makindu_6      | CGCAGATATT | GCAAGAAATG  | GCAATACAAC | AGCCCAGCCT | CGTCTACATA | ATGTACAATT |
| Makindu_7      | CGCAGATATT | GCAAGAAATG  | GCAATACAAC | AGCCCAGCCT | CGTCTACATA | ATGTACAATT |
| Valence_6      | CGCAGATATT | GCAAGAAATG  | GCAATACAAC | AGCCCAGCCT | CGTCTACATA | ATGTACAATT |
| Makindu_8      | CGCAGATATT | GCAAGAAATG  | GCAATACAAC | AGCCCAGCCT | CGTCTACATA | ATGTACAATT |
| Makindu_22     | CGCAGATATT | GCAAGAAATG  | GCAATACAAC | AGCCCAGCCT | CGTCTACATA | ATGTACAATT |
| Canberra_5     | CGCAGATATT | GCAAGAAATG  | GCAATACAAC | AGCCCAGCCT | CGTCTACATA | ATGTACAATT |
| Cann-River_2   | CGCAGATATT | GCAAGAAATG  | GCAATACAAC | AGCCCAGCCT | CGTCTACATA | ATGTACAATT |
| Cann-River_6   | CGCAGATATT | GCAAGAAATG  | GCAATACAAC | AGCCCAGCCT | CGTCTACATA | ATGTACAATT |
| Cann-River_7   | CGCAGATATT | GCAAGAAATG  | GCAATACAAC | AGCCCAGCCT | CGTCTACATA | ATGTACAATT |
| Cann_River_5   | CGCAGATATT | GCAAGAAATG  | GCAATACAAC | AGCCCAGCCT | CGTCTACATA | ATGTACAATT |
| Cann-River_8   | CGCAGATATT | GCAAGAAATG  | GCAATACAAC | AGCCCAGCCT | CGTCTACATA | ATGTACAATT |
| Valence_5      | CGCAGATATT | GCAAGAAATG  | GCAATACAAC | AGCCCAGCCT | CGTCTACATA | ATGTACAATT |
| Valence_9      | CGCAGATATT | GCAAGAAATG  | GCAATACAAC | AGCCCAGCCT | CGTCTACATA | ATGTACAATT |
| Eden_1         | CGCAGATATT | GCAAGAAATG  | GCAATACAAC | AGCCCAGCCT | CGTCTACATA | ATGTACAATT |
| Valence_13     | CGCAGATATT | GCAAGAAATG  | GCAATACAAC | AGCCCAGCCT | CGTCTACATA | ATGTACAATT |
| Eden_7         | CGCAGATATT | GCAAGAAATG  | GCAATACAAC | AGCCCAGCCT | CGTCTACATA | ATGTACAATT |
| Valence_4      | CGCAGATATT | GCAAGAAATG  | GCAATACAAC | AGCCCAGCCT | CGTCTACATA | ATGTACAATT |
| Valence_2      | CGCAGATATT | GCAAGAAATG  | GCAATACAAC | AGCCCAGCCT | CGTCTACATA | ATGTACAATT |
| Valence_1      | -----      | -----       | -----      | -----      | -----      | -----      |
| Valence_7      | -----      | -----       | -----      | -----      | -----      | -----      |
| Makindu_cm1    | CGCAGATATT | GCAAGAAATG  | GCAATACAAC | AGCCCAGCCT | CGTCTACATA | ATGTACAATT |
| Makindu_cm6    | CGCAGATATT | GCAAGAAATG  | GCAATACAAC | AGCCCAGCCT | CGTCTACATA | ATGTACAATT |
| Makindu_1      | CGCAGATATT | GCAAGAAATG  | GCAATACAAC | AGCCCAGCCT | CGTCTACATA | ATGTACAATT |
| Amieu_5        | CGCAGATATT | GCAAGAAATG  | GCAATACAAC | AGCCCAGCCT | CGTCTACATA | ATGTATAATT |
| Eden_11        | CGCAGATATT | GCAAGAAATG  | GCAATACAAC | AGTCCAGCCT | GGTCTACATA | ATGTACAATT |
| Cann-River_10  | CGCAGATATT | GCAAGAAATG  | GCAATACAAC | AGCCCAGTCT | CGTCTACATA | ATGTACAATT |
| Brazzaville_10 | CGCAGATATT | GCAAGAAATG  | GCAATACAAC | AGCCCAGTCT | CGTCTACATA | ATGTACAATT |
| Cann-River_3   | CGCAGATATT | GCAAGAAATG  | GCAATACAAC | AGCCCAGCCT | CGTCTACATA | ATGTACAATT |
| Cann-River_13  | CGCAGATATT | GCAAGAAATG  | GCAATACAAC | AGTCCAGCCT | GGTCTACATA | ATGTACAATT |
| Eden_4         | CGCAGATATT | GCAAGAAATG  | GCAATACAAC | AGTCCAGCCT | GGTCTACATA | ATGTACAATT |
| Makindu_10     | CGCAGATATT | GCAAGAAATG  | GCAACACAAC | AGTCCAGCCT | GGTCTACATA | ATGTACAATT |
| Makindu_11     | CGCAGATATT | GCAAGAAATG  | GCAACACAAC | AGTCCAGCCT | GGTCTACATA | ATGTACAATT |
| Brazzaville_11 | CGCAGATATT | GCAAGAAATG  | GCAATACAAC | AGCCCAGCCT | CGTCTACATA | ATGTGCAATT |
| Brazzaville_12 | CGCAGATATT | GCAAGAAATG  | GCAATACAAC | AGCCCAGCCT | CGTCTACATA | ATGTACAATT |
| Brazzaville_8  | CGCAGATATT | GCAAGAAATG  | GCAATACAAC | AGCCCAGCCT | CGTCTACATA | ATGTACAATT |
| chrU_963982    | -----      | -----       | -----      | -----      | -----      | -----      |
| chr3L_18642496 | -----      | -----       | -----      | -----      | -----      | -----      |
| chrU_3975907   | CGCAGATATT | GCAAGAAATG  | GCAATACAAC | AGCCCAGTCT | CGTCTACATA | ATGTACAATT |
| chrU_10625041  | CGCAGATATT | GCAAGAAATG  | GCAATACAAC | AGCCCAGCCT | CGTCTACATA | ATGTACAATT |
| chrU_2316095   | CGCAGATATT | GCAAGAAATG  | GCAATACAAC | AGCCCAGTCT | CGTCTACATA | ATGTACAATT |
| chrU_4537377   | CGCAGATATT | GCAAGAAATG  | GCAATACAAC | AGCCCAGCCT | CGTCTACATA | ATGTACAATT |
| chrU_5384045   | CGCAGATATT | GCAAGAAATG  | GCAATACAAC | AGCCCAGCCT | CGTCTACATA | ATGTACAATT |
| chrU_5680622   | -----      | -----       | -----      | -----      | -----      | -----      |
| chrU_5950518   | CGCAGATATT | GCAAGAAATG  | GCAATACAAC | AGCCCAGCCT | CGTCTACAAA | ATGTACAATT |
| chrU_6132643   | -----      | -----       | -----      | -----      | -----      | -----      |
| chrX_16602314  | CGCAGATATT | GCAAGAAATG  | GCAATACAAC | AGCCCAGCCT | CGTCTACATA | ATGTACAATT |
| chrU_6536133   | CGCAGCTATT | ACAA- AAATG | GCAATACAAC | GGCACAGCCT | CGTCTACGTA | ATGTACAATT |



|                |         |             |            |            |            |            |
|----------------|---------|-------------|------------|------------|------------|------------|
| chr3R_1506433  | AAAGGGA | AAATATTAAGC | AGCAACACCC | GCTTGACGTT | CAATCAATAT | TGGCACAGCA |
| Brazzaville_16 | AAAGGGA | AAGATTAAGC  | AGCCACACCC | GCTTGACGTT | CAGTCAATAT | TGGCACAGCA |
| Eden_3         | ACAGGGA | AAATATTAAGC | AGCAACATCC | GCTTGACGTT | CAGTCAATAT | TGGCACAGCA |
| Cann-River_9   | ACAGGGA | AAATATTAAGC | AGCAACATCC | GCTTGACGTT | CAGTCAATAT | TGGCACAGCA |
| Amieu_2        | ---     | ---         | ---        | ---        | ---        | ---        |
| Makindu_2      | AAA     | ---         | ---        | ---        | ---        | ---        |
| Makindu_6      | AAAGGGA | AAAATTAAGC  | AGCCACACCC | ---        | ---        | ---        |
| Makindu_7      | AAAGGGA | AAAATTAAGC  | AGCCACACCC | GCTTGACGTT | CAGTCAATAT | TGGCACAGCA |
| Valence_6      | AAAGGGA | AAAATTAAGC  | AGCCACACCC | GCTTGACGTT | CAGTCAATAT | TGGCACAGCA |
| Makindu_8      | AAAGGGA | AAAATTAAGC  | AGCCACACCC | GCTTGACGTT | CAGTCAATAT | TGGCACAGCA |
| Makindu_22     | AAAGGGA | AAAATTAAGC  | AGCCACACCC | GCTTGACGTT | CAGTCAATAT | TGGCACAGCA |
| Canberra_5     | AAAGGGA | AAAATTAAGC  | AGCCACACCC | GCTTGACGTT | CAGTCAATAT | TGGCACAGCA |
| Cann-River_2   | AAAGGGA | AAGATTAAGC  | AGCCACACCC | GCTTGACGTT | CAGTCAATAT | TGGCACAGCA |
| Cann-River_6   | AAAGGGA | AAAATTAAGC  | AGCCACACCC | GCTTGACGTT | CAGTCAATAT | TGGCACAGCA |
| Cann-River_7   | AAAGGGA | AAAATTAAGC  | AGCCACACCC | GCTTGACGTT | CAGTCAATAT | TGGCACAGCA |
| Cann_River_5   | AAAGGGA | AAAATTAAGC  | AGCCACACCC | GCTTGACGTT | CAGTCAATAT | TGGCACAGCA |
| Cann-River_8   | AAAGGGA | AAAATTAAGC  | AGCCACACCC | GCTTGACGTT | CAGTCAATAT | TGGCACAGCA |
| Valence_5      | AAAGGGA | AAAATTAAGC  | AGCCACACCC | GCTTGACGTT | CAGTCAATAT | ---        |
| Valence_9      | AAAGGGA | AAAATTAAGC  | AGCCACACCC | GCTTGACGTT | CAGTCAATAT | TGGCACA--- |
| Eden_1         | AAAGGGA | AAAATTAAGC  | AGCCACACCC | GCTTGACGTT | CAGTCAATAT | TGGCACAGCA |
| Valence_13     | AAAGGGA | AAAATTAAGC  | AGCCACACCC | GCTTGACGTT | CAGTCAATAT | TGGCAC---  |
| Eden_7         | AAAGGGA | AAAATTAAGC  | AGCCACACCC | GCTTGACGTT | CAGTCAATAT | TGGCACAGCA |
| Valence_4      | AAAGGGA | AAAATTAAGC  | AGCCACACCC | GCTTGACGTT | CAGTCAATAT | TGGCACAGCA |
| Valence_2      | AAAGGGA | AAAATTAAGC  | AGCCACACCC | GCTTGACGTT | CAGTCAATAT | TGGCACAGCA |
| Valence_1      | ---     | ---         | ---        | ---        | ---        | ---        |
| Valence_7      | ---     | ---         | ---        | ---        | ---        | ---        |
| Makindu_cm1    | AAAGGGA | AAAATTAAGC  | AGCCACACCC | GCTTGACGTT | CAGTCAATAT | TGGCACAGCA |
| Makindu_cm6    | AAAGGGA | AAAATTAAGC  | AGCCACACCC | GCTTGACGTT | CAGTCAATAT | TGGCACAGCA |
| Makindu_1      | AAAGGGA | AAAATTAAGC  | AGCCACACCC | GCTTGACGTT | CAGTCAATAT | TGGCACAGCA |
| Amieu_5        | AAAGGGA | AAATATTAAGC | AGCAACACCC | GCTTGACGTT | CAATCAATAT | TGGCACAGCA |
| Eden_11        | AAAGGGA | AAATATTAAGC | AGCAACACCC | GCTTGACGTT | CATTCAATAT | TGGCACAGCA |
| Cann-River_10  | AAAGGGA | AAATATTAAGC | AGCAACACCC | GCTTGACGTT | CAGTCAATAT | TGGCACAGCA |
| Brazzaville_10 | AAAGGGA | AAATATTAAGC | AGCAACACCC | GC---      | ---        | ---        |
| Cann-River_3   | AAAGGGA | AAATATTAAGC | AGCAACACCC | GCTTGACGTT | CAGTCAATAT | TGGCACAGCA |
| Cann-River_13  | AAAGGGA | AAATATTAAGC | AGCAACACCC | GCTTGACGTT | CATTCAATAT | TGGCACAGCA |
| Eden_4         | AAAGGGA | AAATATTAAGC | AGCAACACCC | GCTTGACGTT | CATTCAATAT | TGGCACAGCA |
| Makindu_10     | AAAGGGA | AAATATTAAGC | AGCAACACCC | GCTTGACGTT | CATTCAATAT | TGGCACAGCA |
| Makindu_11     | AAAGGGA | AAATATTAAGC | AGCAACACCC | GCTTGACGTT | CATTCAATAT | TGGCACAGC- |
| Brazzaville_11 | AAAGGGA | AAAATTAAGC  | AGCCACACCC | GCTTGACGTT | CAGTCAATAT | TGGCACAGCA |
| Brazzaville_12 | AAAGGGA | AAAATTAAGC  | AGCCACACCC | GCTTGACGTT | CAGTCAATAT | TGGCACAGCA |
| Brazzaville_8  | AAAGGGA | AAAATTAAGC  | AGCCACACCC | GCTTGACGTT | CAGTCAATAT | TGGCACAGCA |
| chrU_963982    | ---     | ---         | ---        | ---        | ---        | ---        |
| chr3L_18642496 | ---     | ---         | ---        | ---        | ---        | ---        |
| chrU_3975907   | AAAGGGA | AAATATTAAGC | AGCAACACCC | GCTTGACGTT | CAGTCAATAT | TGGCACAGCA |
| chrU_10625041  | AAAGGGA | AAATATTAAGC | AGCAACACCC | GCTTGACGTT | CAATCAATAT | TGGCACAGCA |
| chrU_2316095   | AAAGGGA | AAATATTAAGC | AGCAACACCC | GCTTGACGTT | CAGTCAATAT | TGGCACAGCA |
| chrU_4537377   | AAAGGGA | AAATATTAAGC | AGCAACACCC | GCTTGACGTT | CAGTCAATAT | TGGCACAGCA |
| chrU_5384045   | ACAGGGA | AAATATTAAGC | AGCAACATCC | GCTTGACGTT | CAGTCAATAT | TGGCACAGCA |
| chrU_5680622   | ---     | ---         | ---        | ---        | ---        | ---        |
| chrU_5950518   | AAAGGGA | AAATATTAAGC | AGCAACACCC | GCTTGACGTT | CAGTCAATAT | CGGCACAGCA |
| chrU_6132643   | ---     | ---         | ---        | ---        | ---        | ---        |
| chrX_16602314  | AAAGGGA | AAATATTAAGC | AGCAACACCC | GCTTGACGTT | CAGTCAATAT | TGGCACAGCA |
| chrU_6536133   | AAAGGGA | GATATTAAGC  | AGTATCACCC | GCTTGAAGTT | CAGTCAATAT | TAGCACAGCA |

1501

|                |            |          |     |          |                    |
|----------------|------------|----------|-----|----------|--------------------|
| chr3R_1506433  | ACAGGAACAA | TTTATGAA | --  | ---      | GTGGC              |
| Brazzaville_16 | ACAGGAACAA | TTTATGAA | --  | ---      | GTGGC              |
| Eden_3         | ACAGGAACAA | TTTA     | --- | ---      |                    |
| Cann-River_9   | ACAGGAACAA | TTTATGAA | --  | ---      | GTGG               |
| Amieu_2        | -----      | -----    | --- | ---      |                    |
| Makindu_2      | -----      | -----    | --- | ---      |                    |
| Makindu_6      | -----      | -----    | --- | ---      |                    |
| Makindu_7      | ACAGGAACAA | TTTATGAA | --  | ---      | GTGGC              |
| Valence_6      | ACAGGAAGAA | TTTATGAA | --  | ---      | GTGGC              |
| Makindu_8      | ACAGGAACAA | TTTATGAA | --  | ---      | GTGGC              |
| Makindu_22     | ACAGGAACAA | TTTATGAA | --  | ---      | GTGGC              |
| Canberra_5     | ACAGGAACAA | TTTATGAA | --  | ---      | GTGGC              |
| Cann-River_2   | ACAGGAACAA | TTTATGAA | --  | ---      | GTGGC              |
| Cann-River_6   | ACAGGAACAA | TTTATGAA | --  | ---      | GTGGC              |
| Cann-River_7   | ACAGGAACAA | TTTATGAA | --  | ---      | GTGGC              |
| Cann_River_5   | ACAGGAACAA | TTTATGAA | --  | ---      | GTGGC              |
| Cann-River_8   | ACAGGAACAA | TTTATGAA | --  | ---      | GTGGC              |
| Valence_5      | -----      | -----    | --- | ---      |                    |
| Valence_9      | -----      | -----    | --- | ---      |                    |
| Eden_1         | ACAGGAACAA | TTTATGAA | --  | ---      | GTGGC              |
| Valence_13     | -----      | -----    | --- | ---      |                    |
| Eden_7         | ACAGGAACAA | TTTATGAA | --  | ---      | GTGGC              |
| Valence_4      | ACAGGAAGAA | TTTATGAA | --  | ---      | GTGGC              |
| Valence_2      | ACAGGAAGAA | TTTATGAA | --  | ---      | GTGGC              |
| Valence_1      | -----      | -----    | --- | ---      |                    |
| Valence_7      | -----      | -----    | --- | ---      |                    |
| Makindu_cm1    | ACAGGAAGAA | TTTATGAA | --  | ---      | GTGGC              |
| Makindu_cm6    | ACAGGAAGAA | TTTATGAA | --  | ---      | GTGGC              |
| Makindu_1      | ACAGGAACAA | TTTATGAA | --  | ---      | G---               |
| Amieu_5        | ACAGGAACAA | TTTATGAA | --  | ---      | GTGGC              |
| Eden_11        | ACAGGAACAA | TTTATGAA | --  | ---      | G <sub>2</sub> GGC |
| Cann-River_10  | ACAGGAACAA | TTTATGAA | --  | ---      | G---               |
| Brazzaville_10 | -----      | -----    | --- | ---      |                    |
| Cann-River_3   | GCAGGAACAA | TTTATGAA | --  | ---      | G---               |
| Cann-River_13  | ACAGGAACAA | TTTATGAA | --  | ---      | GTG-               |
| Eden_4         | ACAGGAACAA | TTTATGAA | --  | ---      | GTGG-              |
| Makindu_10     | ACAGGAACAA | TTTATGAA | --  | ---      | GTGGC              |
| Makindu_11     | -----      | -----    | --- | ---      |                    |
| Brazzaville_11 | ACAGGAACAA | TTTATGAA | --  | ---      | GTGGC              |
| Brazzaville_12 | ACAGGAACAA | -----    | --- | ---      |                    |
| Brazzaville_8  | ACAGGAAC   | -----    | --- | ---      |                    |
| chrU_963982    | -----      | -----    | --- | ---      |                    |
| chr3L_18642496 | -----      | -----    | --- | ---      |                    |
| chrU_3975907   | ACAGGAACAA | TTTATGAA | --  | ---      | GTGGC              |
| chrU_10625041  | GCAGGAACAA | TTTATGAA | TT  | GTAACTGA |                    |
| chrU_2316095   | ACAGGAACAA | TTTATGAA | --  | ---      | GTGGC              |
| chrU_4537377   | ACAGGAACAA | TTTATGAA | --  | ---      | GTGGC              |
| chrU_5384045   | ACAGGAACAA | TTTATGAA | --  | ---      | TTGGC              |
| chrU_5680622   | -----      | -----    | --- | ---      |                    |
| chrU_5950518   | GCAGGAACAA | TTTATGAA | --  | ---      | GTGGC              |
| chrU_6132643   | -----      | -----    | --- | ---      |                    |
| chrX_16602314  | ACAGAAACAA | TTTATGAA | --  | ---      | GTGGC              |
| chrU_6536133   | GCATGAACAA | TATACGAA | --  | ---      | TTGGC              |
